1  
2  
3  
4  
5  
6  
7  
8  
9  
10  
11  
12  
13  
14  
15  
16  
17  
18  
19  
20

**Patterns of Arc mRNA expression in the rat brain following dual recall of fear- and  
reward-based socially acquired information**

Laura A. Agee<sup>1</sup>, Emily N. Hilz<sup>1</sup>, Dohyun Jun<sup>1</sup>, Victoria Nemchek<sup>1</sup>, Hongjoo J. Lee<sup>1,2</sup>, and Marie-  
H. Monfils<sup>1,2\*</sup>

<sup>1</sup>Department of Psychology, The University of Texas at Austin, Austin, TX, USA

<sup>2</sup>Institute for Neuroscience, The University of Texas at Austin, Austin, TX, USA

\* Corresponding Author

E-mail: [marie.monfils@utexas.edu](mailto:marie.monfils@utexas.edu) (MHM)

## 21 Abstract

22

23           The ability to learn new information and behaviors is a vital component of survival in most  
24 animal species. This learning can occur via direct experience or through observation of another  
25 individual (i.e., social learning). While research focused on understanding the neural mechanisms  
26 of direct learning is prevalent, less work has aimed at understanding the brain circuitry mediating  
27 the acquisition and recall of socially acquired information. We aimed to further elucidate the  
28 mechanisms underlying recall of socially acquired information by having rats sequentially recall a  
29 socially transmitted food preference (STFP) and a fear association via fear conditioning by-proxy  
30 (FCbP). Brain tissue was processed for mRNA expression of the immediate early gene (IEG) *Arc*,  
31 which reliably expresses in the cell nucleus following transcription before migrating to the  
32 cytoplasm over the next 25 minutes. Given this timeframe, we were able to identify whether *Arc*  
33 transcription was triggered by STFP recall, FCbP recall, or following recall of both memories.  
34 Surprisingly – and contrary to past research examining expression of other IEGs following STFP  
35 or FCbP recall separately – we found no differences in any of the *Arc* expression measures across  
36 a number of prefrontal regions and the vCA3 of the hippocampus between controls,  
37 demonstrators, and observers, though we did detect an overall effect of sex in a number of  
38 regions. We theorize that these results may indicate that relatively little *Arc*-dependent neural  
39 restructuring is taking place in the prefrontal cortices following recall of a recently socially acquired  
40 information or directly acquired fear associations in these areas.

41

42 *Key Words:* *Arc* mRNA, social transmission of food preference, fear conditioning by-proxy, social  
43 learning, memory recall

## 44 **Introduction**

45  
46 An animal's capacity to survive in a new environment is largely contingent on their ability  
47 to learn about and adapt to their surroundings by identifying both potential threats and sources  
48 for fulfilling essential needs. Humans, perhaps more than any other species, are particularly adept  
49 at acquiring new strategies to deal with environmental challenges or exploit avenues for securing  
50 resources. One of the primary ways in which we are able to learn such strategies at an individual  
51 level is through receiving instructions or observing an experienced individual, i.e., via social  
52 learning. As such, it should not be surprising that deficits in the ability to socially learn have the  
53 potential to significantly impair functioning. This can be seen in autism spectrum disorders, in  
54 which much of the symptomology is thought to arise from impairments in the social  
55 attention/reward systems and, by extension, the social learning system [1–3].

56 Conversely, there are also drawbacks if social learning occurs too indiscriminately. While  
57 valuable information and adaptive behaviors can be acquired socially, this does not preclude  
58 individuals from socially acquiring false information or maladaptive behaviors through the same  
59 pathway. Clinically, this is often seen in phobias, which are commonly reported to have been  
60 acquired through observation or instruction (e.g., watching a parent react with extreme fear to a  
61 spider or receiving dire warnings about the danger of spiders, respectively) rather than by direct  
62 experience [4,5]. Socially acquired phobias may also be disruptive in ways directly acquired  
63 phobias are not, because the individual has not directly experienced the aversive consequences  
64 in relation to the feared stimuli. As such, they are free to imagine an associated outcome that may  
65 be more intense than what occurs in reality. In line with this idea, individuals with socially acquired  
66 phobias report increased cognitive symptomology [6] and respond more favorably to certain  
67 treatment methods [4] than do individuals with directly acquired phobias.

68 To truly understand and subsequently develop optimal treatments for conditions arising  
69 from under- or over-performing social learning, a thorough understanding of the brain

70 mechanisms that underlie the social learning process is an essential first step. One of the primary  
71 methods we have for exploring such mechanisms are non-human animal models. In rodent  
72 species, fear-based social learning has been demonstrated to occur under multiple conditions,  
73 including: (1) context or stimulus associated fear acquired by observation through a barrier of a  
74 conspecific experiencing pain in a novel environment or following the presentation of a novel  
75 stimulus [7,8], (2) enhanced acquisition of natural behaviors by observation of a conspecific  
76 responding to a threatening stimuli [9–11], and (3) by observation of a fear conditioned  
77 demonstrator reacting to the fear-associated stimuli post-conditioning in a paradigm known as  
78 fear conditioning by-proxy (FCbP) [12–14].

79 While similar reward-based models of social learning in rodents have proven somewhat  
80 more difficult to develop [15], one reliable and well-established model of reward-based socially  
81 mediated learning does exist in the social transmission of food preference (STFP) paradigm [16–  
82 19]. In the STFP paradigm, rats assigned to the ‘demonstrator’ condition consume a novel food  
83 (generally powdered chow mixed with flavoring, such as cinnamon) before interacting with a naïve  
84 rat assigned to the ‘observer’ condition. When observers are later given the choice to consume  
85 either the demonstrated flavor or an entirely novel flavor, they reliably show the tendency to  
86 consume more of the demonstrated flavor. This effect has been shown to be mediated by the  
87 semiochemical carbon disulfide (CS<sub>2</sub>) which is present in the nasal cavity of rats and, when paired  
88 with a novel scent, is sufficient to induce a preference for similarly scented foods [17].

89 In rodents, there has been a fair amount of research examining the brain mechanisms  
90 mediating the acquisition and recall processes for the social transmission of food preference task  
91 [20–24] and, to a lesser extent, socially acquired fears [7,12,13,25–27]. Results from research  
92 into the latter topic have also found that there are a number of brain areas that seem to be uniquely  
93 activated during social fear learning and not direct fear learning [13,27]. Furthermore, integrative  
94 models considering the results from both human and non-human animal research into the brain  
95 circuitry underlying the social learning of appetitively and aversively motivated

96 behaviors/associations posit that, while there does seem to be considerable overlap between the  
97 brain areas governing direct learning processes and social learning processes, activity in some  
98 unique brain regions is required for social learning to occur [13,28].

99         While the neural mechanisms involved in the social acquisition of tasks and information  
100 has received some exploration, research explicitly comparing the storage of memories acquired  
101 by social learning to memories acquired by direct learning is, to our knowledge, almost  
102 nonexistent. In the experiment described here, we attempted to examine activation in various  
103 brain regions following recall of a socially acquired memory from both a reward- and fear-based  
104 task. Rats were trained in a reward-based form of social learning, STFP, and a fear-based model  
105 of social learning, FCbP, after which we initiated sequential recall of both memories. The tissue  
106 from these rats was then processed for mRNA expression of the immediate-early gene (IEG) – a  
107 class of genes which are rapidly transcribed following neuronal firing or other cellular stimuli - *Arc*  
108 which, when transcribed, produces the mRNA for the activity-regulated cytoskeleton associated  
109 (*Arc*) protein. *Arc* mRNA has a predictable pattern of expression such that in the first 5 minutes  
110 following transcription it is expressed in the nucleus of the cell and, after about 25 minutes,  
111 migrates to the cytoplasm surrounding the nucleus [29]. As such, cells stained for *Arc* mRNA that  
112 are activated at both timepoints show expression in both the cytoplasm and nucleus, allowing for  
113 precise localization of cell populations activated in multiple tasks. By analyzing the expression of  
114 *Arc* mRNA in rat brains perfused following the sequential recall of FCbP and STFP tasks, we  
115 aimed to identify brain regions uniquely involved in retrieval of socially acquired information. The  
116 anterior cingulate cortex [7,13,28], orbitofrontal cortices [23,24], and infralimbic and prelimbic  
117 cortices [23,30–32] were all of particular interest given past research which has implicated them  
118 in fear learning, social fear learning, STFP learning, or some combination of the three.

119

## 120 **Methods**

### 121 **Subjects**

122

123           Subjects were male and female Sprague-Dawley rats bred in house in the Animal  
124 Resource Center of the University of Texas at Austin. Eight breeding pairs were used to produce  
125 the subjects for Cohort 1 of this experiment - with seven successfully breeding - while eight  
126 separate breeding pairs were used to produce the subjects for Cohort 2. Female breeding animals  
127 were Sprague-Dawley rats (between 215-260g at arrival) obtained from Charles-Rivers  
128 (Wilmington, MA, USA) while male breeding animals were Sprague-Dawley rats (most between  
129 275-300g at arrival with one at 230g) obtained from Harlan (now Envigo) (Houston, TX, USA) to  
130 prevent accidental inbreeding. All rats were paired off with an opposite-sex cage mate following  
131 arrival to the colony. Once a female began to show clear signs of pregnancy, her paired male was  
132 removed from the cage and rehoused.

133           Once delivered, pups were weaned into triads of same-sex siblings at post-natal day 21  
134 (P21) to help ensure social fear learning [26]. Spare pups were weaned into triads or dyads with  
135 unrelated rats and used in other experiments at the University of Texas at Austin. Female pups  
136 from our second cohort litter were used in other experiments. The final number of pups used for  
137 this experiment were  $n = 27$  for Cohort 1 females,  $n = 36$  Cohort 1 males, and  $n = 27$  Cohort 2  
138 males. Pups being utilized in this experiment were allowed to mature with minimal disturbances  
139 aside from routine animal husbandry procedures (e.g., cage changes) until habituation  
140 procedures (Females triads) or dominance assessment procedures (Male triads) began. All  
141 Cohort 1 rats started on habituation procedures between P106-P112 days of age (young  
142 adulthood) and all Cohort 2 rats were started between P99-P118 days of age. All subjects were  
143 kept on a 3 pm – 3 am lights off light-cycle and all experimental procedures were completed during  
144 the subjects' dark cycle. All parts of this experiment were conducted in compliance with the

145 National Institutes of Health Guide for the Care and Use of Experimental Animals and were  
146 approved for use by The University of Texas at Austin Animal Care and Use Committee.  
147

## 148 **Apparatus and Stimuli**

### 149 **Fear Conditioning**

150  
151 All fear conditioning and fear conditioning by-proxy procedures were completed in  
152 standard conditioning chambers (30.48 cm x 25.4 cm x 30.48 cm) constructed of clear plexiglass  
153 walls in the front and back, two steel walls on the side, and a plexiglass ceiling with a hole in the  
154 center. The flooring of the chamber was a row of stainless-steel rods connected to a shock  
155 generator (Coulbourn Instruments, Allentown, PA). All chambers were enclosed in acoustic  
156 isolation boxes (Coulbourn Instruments) and lit with an internal red light. Behavior was recorded  
157 by closed-circuit cameras (Panasonic™ WV-BP334) mounted above the conditioning chambers  
158 with the lens inserted through the hole in the plexiglass ceiling. Chambers were fully wiped down  
159 with 70% alcohol solution between each subject. All stimulus delivery was controlled using the  
160 Freeze Frame software (Coulbourn Instruments). The conditioned stimulus (CS) was a 20 second  
161 tone (5kHz, 80 dB) and, in procedures with multiple CS presentations, a variable inter-trial interval  
162 (ITI) averaging 180 seconds. The unconditioned stimulus (US) was a 1 mA shock that was 500  
163 milliseconds in duration and co-terminated with the conditioned stimulus.

### 164 **Social transmission of food preference**

165  
166 All STFP procedures took place in a room adjacent to the room containing the conditioning  
167 chambers. Novel diets were composed by mixing 100g of powdered 5LL2 Purina rodent chow  
168 with either 1g of McCormick ground cinnamon (diet Cin) or 2g of Hershey cocoa powder (diet Co).  
169 The Plain diet, which was given to all rats during the food restriction period and to Control rats on

170 the terminal day of experimental procedures, was unadulterated powdered 5LL2 Purina rodent  
171 chow. All powdered chows – both during food restriction and experimental procedures – were  
172 presented in hanging food cups that were constructed from 4 oz. glass jars and 12-gauge steel  
173 utility wire. Food cups were rinsed then wiped down with a 70% ethanol solution before being  
174 washed thoroughly with soap and water between every use. All consummatory phases of the  
175 STFP experimental procedures took place in standard rat cages (26.7 cm x 48.3 cm x 20.3 cm),  
176 with every animal receiving a fresh cage. The interaction phase (STFP acquisition phase) took  
177 place in a large plastic bin (50.5 cm × 39.4 cm × 37.5 cm) with wood chip floor bedding that was  
178 replaced between every group. Plastic bins were wiped down thoroughly with Windex between  
179 each session.

## 180 **Overview of Experimental Design & Social Learning** 181 **Procedures**

182  
183 (See Fig 1 for a graphical overview)

184 All rats were food restricted for five days and habituated to handling and the room where  
185 STFP procedures would take place for four days immediately prior to day 1 of experimental  
186 procedures. While habituation procedures ended prior to day 1 of experimental procedures, food  
187 restriction continued through to the end of the experiment. One animal from each triad of rats was  
188 assigned to one of three conditions: Demonstrator, Observer, or Control. Cohort 2 male triads  
189 had been assessed for dominance and all showed a clear hierarchy and were assigned such that  
190 the dominant rat was the Demonstrator and a subordinate was the Observer to enhance social  
191 transmission of fear [13]. Individual triads were further randomly subdivided into groups where  
192 the Demonstrator and Observer would receive a choice test at STFP recall (Choice) and groups  
193 where they would receive only the demonstrated food (Cin).



194 On day 1 of the experimental procedure, rats assigned to the Demonstrator condition were  
 195 moved to conditioning chambers and allowed to habituate for 10 minutes before they were

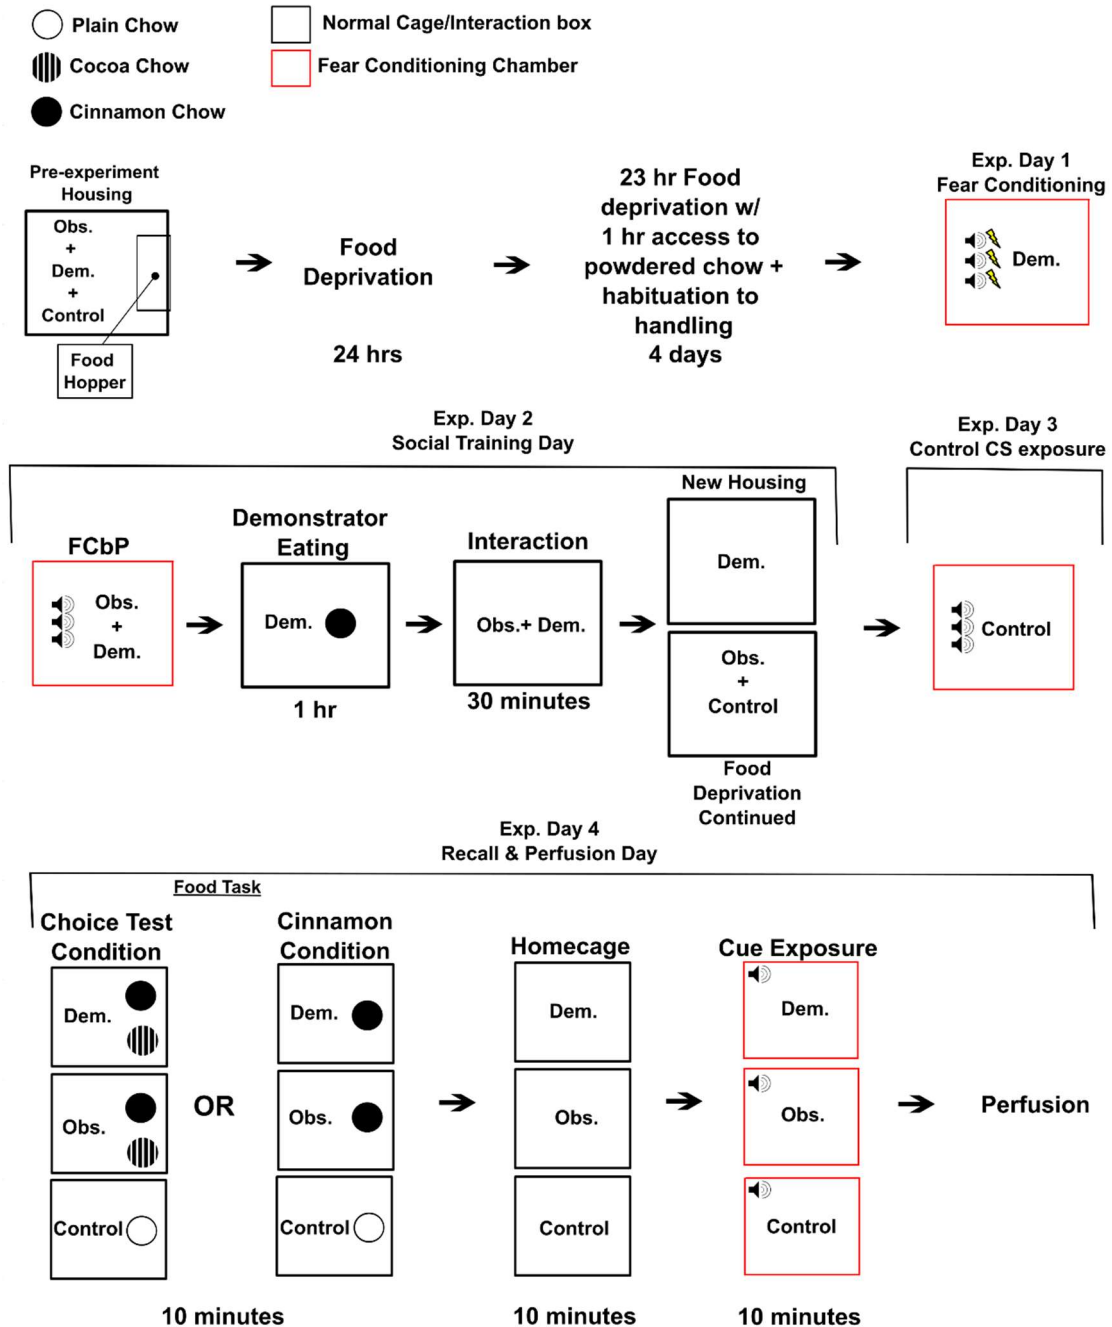

**Fig 1. Overview of Experiment Design.** This figure outlines the treatment of rats on each day of the experiment from the first day of food restriction on.

196 exposed to 3 CSs that co-terminated with a painful shock (see **Apparatus and Stimuli** for  
197 specifics). Following fear conditioning procedures, Demonstrators were moved back to their  
198 original home cage. On day 2 of experimental procedures, 24 hours after fear conditioning,  
199 Demonstrators were returned to the conditioning chambers with their cage-mate assigned to the  
200 Observer condition and put through the FCbP procedure. Immediately following the FCbP  
201 procedure, Observer rats were returned to their home-cage while Demonstrators were moved to  
202 an adjacent room and given 1 hour to consume powdered chow flavored with cinnamon. After an  
203 hour had passed, Observers were moved to an interaction bin with their Demonstrator and  
204 allowed to interact with them for 30 minutes to allow for acquisition of a socially transmitted food  
205 preference. Previous research from our lab has validated these timepoints as being sufficient for  
206 STFP transmission [33]. Afterwards, Observer rats were returned to their home-cage while  
207 Demonstrator rats were moved to single housing to prevent further STFP transmission to the  
208 Observer or Control. On day 3 of experimental procedures, Control rats were moved to  
209 conditioning chambers alone and, following 10 minutes of habituation to the chamber, were  
210 presented with three 20 second CSs with no accompanying shock. This was done on a separate  
211 day to minimize the possibility of lingering alarm pheromones – which are known to be released  
212 by rats in response to threatening stimuli and effect conspecific learning [34] – still being present  
213 in the chamber.

214 On the terminal day of the experiment, day 4, recall was initiated for both the socially  
215 transmitted food preference and the fear conditioning/fear conditioning by-proxy memories. All  
216 Observers and Demonstrators from triads assigned to the Choice condition were allowed 10  
217 minutes *ad libitum* access to both cinnamon and cocoa flavored diets, while Observers and  
218 Demonstrators from triads assigned to the Cin condition were given 10 minutes *ad libitum* access  
219 to the cinnamon diet only. In all triads, Control rats were given 10 minutes *ad libitum* access to  
220 plain powdered chow. Immediately after this, rats were returned to their home-cage and left  
221 undisturbed for a 10-minute period before being moved back to the lab space and being placed

222 in the conditioning chambers. All rats were then given a 3-minute habituation period to the  
223 chamber before being presented with a single 20 second CS. 5 minutes after the end of the CS,  
224 all rats were euthanized via injection of a pentobarbital and phenytoin solution (Euthasol; Virbac  
225 Animal Health) and perfused. Their brains were later processed for *Arc* mRNA expression. Given  
226 the time course of our terminal procedure and the known migration timeframe of *Arc* mRNA [28],  
227 increases cytoplasmic expression of *Arc* mRNA would be due to STFP recall procedures, while  
228 nuclear expression would be due to FC/FCbP recall procedures, with cells showing dual activation  
229 having been activated at both timeframes (see Fig 2; also, see **Tissue Analysis** for details on  
230 tissue treatment and processing).

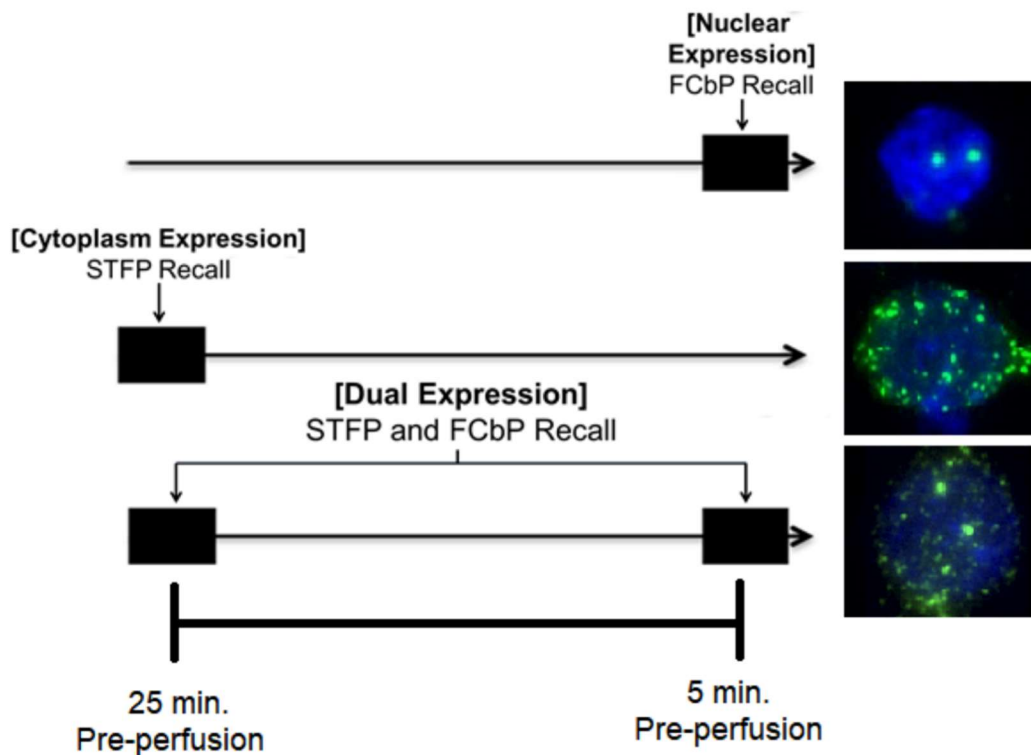

**Fig 2. Patterns of *Arc* mRNA Expression.** The above figure shows the pattern and area within a cell in which we would see *Arc* mRNA expression triggered by activity at the FCbP recall timepoint, the STFP recall timepoint, or activity that was triggered at both timepoints.

## 231 **Procedures**

### 232 **Habituation and food restriction**

233

234 All habituation took place just prior to the first day of experimental procedures. Habituation  
235 consisted of each cage of rats being moved into the room in which all STFP experimental  
236 procedures would take place and being allowed to habituate to the room for 15 minutes. During  
237 this period, each rat was picked up and handled by the experimenter that would be running  
238 behavior for 2 minutes to habituate them to handling and that individual. All habituation procedure  
239 took place in a dark room under red light, and all rats received 4 days of habituation. Food  
240 restriction began the day before habituation began and persisted to the end of the experiment. At  
241 the start of food restriction, the food pellets that all subjects had been eating were removed from  
242 the cage. Subsequently, all cages were given daily *ad libitum* access to a hanging jar full of plain,  
243 powdered Purina 5LL2 diet in their home-cage. Rats were weighed daily starting at the beginning  
244 of food restriction until the experiment was over to ensure no unusual loss in weight.

### 245 **Play behavior dominance assessment**

246

247 A day prior to play dominance assessments, all males were moved to single housing to  
248 promote social play behavior. Following a 24-hour isolation period, individuals from each triad  
249 were moved to a large plastic bin (50.5 cm × 39.4 cm × 37.5 cm) with woodchip bedding and a  
250 camera mounted overhead to record behavior. Rats were allowed to interact for 15 minutes before  
251 being removed from the box and returned to single housing. This was repeated for 3 sessions,  
252 after which rats were returned to their triads and left undisturbed until the start of the milk  
253 competition dominance assessment. Behavior was scored as described below, and rats in Cohort  
254 2 were assigned to one of three dominance ranks based on their behavior as following with past  
255 research on dominance hierarchies in rats [35]: Dominant, Subordinate 1, or Subordinate 2. Male  
256 rats in cohort 1 were randomly assigned condition regardless of dominance rank. As described in

257 Jones & Monfils [13], dominant rats were the rats that received most nape contact (i.e., play  
258 initiations), while subordinate 1 was the rat that initiated the dominant the most, and subordinate  
259 2 tended to be avoidant. While all Cohort 1 males were used, male triads in Cohort 2 that did not  
260 show dominance hierarchies were removed from the study and used in other experiments.  
261 Analysis of play behavior dominance included only Cohort 2 rats.

## 262 **Milk competition dominance assessment**

263  
264 In order to validate dominance assignments made using the play behavior assessment,  
265 we recorded and scored the behavior of male rats allowed access to a desired resource  
266 (sweetened milk solution), a dominance assessment that our lab previously found to be effective  
267 [13]. The milk solution used in this dominance assessment was a mixture of 2/3 tap water and 1/3  
268 sweetened condensed milk (Eagle™) stored in a 2 oz glass jar filled to the top with the solution.  
269 Prior to running the dominance assessment, rats from all male triads were moved to single-  
270 housing and given access to a full jar of the milk for 5-hours to ensure that each individual rat had  
271 the opportunity to overcome their neophobia of the milk solution. Following this, rats were returned  
272 to their triads and allowed access to a full jar of the milk solution as a group daily for four days. In  
273 order to assure that rats would be motivated to drink, food hoppers were removed from all triads  
274 12 hours before the milk was introduced. Following the 3-hour milk access period, hoppers were  
275 returned until removal time for the next day of habituation.

276 Once habituation to the milk solution had been completed, triads were run through the  
277 formal dominance assessment. As during habituation, food hoppers were removed 12 hours  
278 before the start of assessment to promote competition. 2 oz glasses were filled with to the top  
279 with the milk solution and secured with adhesive strips to the bottom of a large plastic bin (50.5  
280 cm × 39.4 cm × 37.5 cm) with woodchip bedding and portable cameras were mounted above the  
281 box for an over-the-head view of all behavior. Rats were placed in the bin and allowed access for  
282 either 12 minutes (Cohort 1) or 10 minutes (Cohort 2) before being removed and returned to their

283 triads. While only two sessions of the competition were run for our Cohort 1 males, three sessions  
284 were run for Cohort 2 in an attempt to obtain clearer dominance hierarchies.

## 285 **Behavioral Scoring**

286  
287 All behavioral scoring for this experiment was completed using the Behavioral Observation  
288 Research Interactive Software (BORIS) [36].

## 289 **Play dominance scoring**

290  
291 Behavior was scored for the full play session, with both offensive play behaviors (i.e., play  
292 initiations or attacks) and defensive play behaviors (i.e., response to play initiations, specifically  
293 nape contact) being scored (see [13,35,37]). The following offensive play behaviors were scored:  
294 (1) Nape contact, contact of a rat's snout with the nape of another rat and (2) Boxing, which  
295 occurred when rats reared and punched at each other with their front legs. The defensive  
296 behaviors scored for were: (1) Counter, in which the attacked rat turns to face the attacking animal  
297 to launch an attack of their own; (2) Evasion, in which the attacked rat flees from the attacker; (3)  
298 Full rotation, in which the target rotates fully into a supine position; (4) Half rotation, in which the  
299 targeted animal responds to the attack by shifting their body laterally to break contact without fully  
300 losing their feet; (5) No response, in which the target either freezes or carries on at a normal pace  
301 in response to attack. The identity of both the initiating rat and their target was noted for every  
302 instance of play behavior. Across all sessions, the total nape contacts received for each individual  
303 rat was tallied and divided by the total number of nape contact initiated in the cage to determine  
304 the percent of contacts each rat had received. If a rat had received a disproportionate amount of  
305 contact (>40%) they were deemed the dominant animal.

## 306 **Milk competition scoring**

307

308 Behavior for milk competition began to be scored as soon as all rats were in the bin and  
309 the experimenter had exited the footage. Behavior was scored in 1-minute bins for 10-12 minutes.  
310 The duration of each subject drinking from or monopolizing the milk jar (i.e., drinking from or  
311 having paws/body on the jar and preventing the other rats' access) was scored for each 1-minute  
312 interval. To calculate percent monopolization of the resource, the total time all rats spent drinking  
313 in each bin was summed and the time spent drinking for individual rats was divided by that value.  
314 The amount of time spent drinking was then plotted based on play behavior dominance  
315 assignments for all rats.

### 316 **Fear conditioning by-proxy social contact scoring**

317  
318 Past research from our lab has indicated that there is a strong relationship between the  
319 amount of fear displayed by observers at the long-term memory test and the time spent interacting  
320 with their Demonstrator during the CS in males [13] and after the CS in females [14,26]. As such,  
321 videos of the social acquisition phase of fear-conditioning by proxy were scored for social  
322 interaction between the Observer and Demonstrator for each 20 second period during the CS  
323 presentation and the 20 second period immediately following each CS presentation to provide a  
324 secondary index of fear acquisition. Social contact was scored when Observer and Demonstrator  
325 animals made contact other than in passing during the cue period (during CS contact) or in the  
326 20 seconds following the CS (post CS contact). The percentage of each score period spent in  
327 contact with the Demonstrator was calculated. Data for percent contact during the cue period for  
328 males and data for the percent contact immediately following the cue period for females was  
329 pulled and combined into a single "relevant contact" measure to be used in all final statistical  
330 analyses.

### 331 **Choice test scoring**

332

333 Videos of the choice test to initiate recall of a socially transmitted food preference were  
334 scored for the amount of time that a given rat spent interacting with a food cup based on whether  
335 it contained the demonstrated/already consumed diet (diet Cin) or the novel diet (diet Co). This  
336 was done as a potential secondary measure of food preference, as we anticipated that due to the  
337 choice test being abnormally short (10 minutes) by necessity that we might be unable to detect  
338 preferences based on amount eaten alone. Interaction with the food cup was scored for whenever  
339 a rat was physically in contact with and not actively moving away from the cup (i.e., front paws in  
340 contact with the jar, head inside jar, climbing on top of the jar, or actively eating from the jar). For  
341 statistical analysis, we calculated the percent of time spent interacting with a cup containing a  
342 given diet based on the total amount of time spent interacting with either cup (e.g., for diet Cin,  
343  $\text{Percent time} = \text{Time}_{\text{Diet Cin}} / (\text{Time}_{\text{Diet Co}} + \text{Time}_{\text{Diet Cin}})$ ). The full 10-minute choice test session was  
344 scored for all rats that underwent the choice test with the exception of one rat whose video was  
345 unavailable due to recording equipment failure.

## 346 **Tissue analysis**

347  
348 To minimize degradation of mRNA by ribonuclease (RNase), all equipment and surfaces used  
349 during brain preparation and processing were sanitized regularly with either RNase AWAY™  
350 (Thermo Scientific; Waltham, MA, USA) or RNaseZap™ (Ambion; Grand Island, NY, USA).

## 351 **Brain Preparation**

352  
353 Immediately following euthanasia, subjects were perfused intracardially using a 4%  
354 paraformaldehyde (PFA) solution. Brains were then removed and submerged in the 4% PFA  
355 solution to allow post-fixation for 24-48 hours. Once post-fixation was complete, brains were  
356 transferred to a solution of 30% sucrose in phosphate buffered saline for cryoprotection. Once  
357 brains had sunk to the bottom of the vial, indicating sufficient sucrose uptake for cryoprotection,



358 they were flash frozen in powdered dry ice and moved to a -80°C freezer for storage until  
359 sectioning. Brains were then sectioned coronally on a sliding microtome at 30 µm thickness into  
360 six series (so subsequent sections in a single series were 180 µm apart) and immediately  
361 mounted and allowed to air dry before being placed in a vacuum chamber with humidity sponges  
362 where they were left to dry fully for 24 hours. Only hippocampal sections (approximately -3.2 to -  
363 5.2 from bregma) or prefrontal regions (approximately +3.7 to +1.4 from bregma) containing the  
364 areas of interest were sectioned and processed. Mounted sections were then placed in a sealed  
365 slide box and stored in a -80°C freezer until processing.

## 366 **Tissue processing**

367  
368 All procedures were modified from the protocols used in Lee et al. [38] and Petrovich et  
369 al. [39]. Prior to tissue processing, a cRNA probe for *Arc* mRNA was constructed starting with a  
370 plasmid containing a full-length cDNA (~3.0 kbp) of the *Arc* transcript. To create the probe, the  
371 DNA was first cut by mixing the plasmid with a 10x digestion buffer (NEBuffer; Biolabs; Ipswich,  
372 MA, USA), a 10x EcoRI restriction enzyme (Biolabs), and purified nuclease free water (Ambion)  
373 before being incubated at 37°C for 2 hours. Proper cutting of the DNA was verified using  
374 electrophoresis, after which the DNA was purified overnight in ethanol. Following purification, the  
375 DNA pellet was spun out in a centrifuge, washed in EtOH, fully dried, and resuspended in a TE  
376 buffer. To verify that the DNA was properly linearized, calculate *Arc* concentration, and check that  
377 no contaminants were present, a sample of the DNA was tested via spectrophotometry (Nanodrop  
378 Lite; Thermo Scientific, Waltham, MA, USA). The Digoxigenin (DIG) labelled probe was  
379 transcribed by combining the linearized DNA with RNase free water (Ambion), a 10x transcription  
380 buffer (Ambion), RNase block (Ambion), DIG RNA labelling mix (Roche Applied Science;  
381 Indianapolis, IN, USA), and a T7 RNA polymerase (Ambion) before incubating the solution at  
382 37°C for 2 hours. Finally, the probe was diluted in nuclease free water and purified in a mini Quick-  
383 Spin column (Roche).

384           Once the cRNA probe had been constructed, slides containing tissue from the male rats  
385 were submerged for 40 minutes in a 4% PFA solution to increase tissue integrity throughout *in*  
386 *situ* processing. Tissue from female rats were processed without this PFA wash. Slides were then  
387 washed and incubated in a proteinase K (PK) buffer at 37°C before being treated with a 0.5%  
388 acetic anhydride/1.5% triethanolamine solution containing glacial acetic acid for permeabilization.  
389 Slides were then washed in a saline-sodium citrate (SSC) buffer before being dehydrated by  
390 submersion in ascending concentrations of ethanol and air dried. Finally, each slide was covered  
391 in 300 µl of a hybridization buffer containing yeast tRNA (Invitrogen; Carlsbad, CA, USA), salmon  
392 sperm DNA (Ambion), dithiothreitol (Sigma; St. Louis, MO, USA), and the cRNA probe. Each slide  
393 was cover slipped and temporarily sealed using a DPX mountant (Electron Microscopy Sciences;  
394 Hatfield, PA, USA) before being incubated in the hybridization solution for 20 hours at 60°C.

395           Once hybridization was complete, cover slips were carefully removed, and slides were  
396 incubated in a 4xSSC buffer mixed with sodium thiosulfate (ST) at 60°C for an hour before being  
397 treated with an ethylenediaminetetraacetic acid-based solution to inhibit RNase activity at 37°C.  
398 Following this, slides were washed in descending concentration of SSC solution mixed with ST  
399 again at 60°C. Tissue was then washed in a detergent solution (Tween20; Sigma) before being  
400 stained with the PerkinElmer TSA Fluorescein system (NEL701001KT; PerkinElmer, Waltham,  
401 MA, USA). Slides were placed in a humid chamber and treated with blocking buffer followed by  
402 an anti-DIG-HRP conjugate for 2 hours. Slides were then briefly washed in the detergent solution  
403 before being returned to a dark humid chamber and coated with a solution containing fluorescein  
404 tyramide reagent (FITC) and allowed to sit for 30 minutes. Finally, slides were washed, allowed  
405 to air dry, and cover slipped with a mountant containing the nuclear stain 4',6-diamidino-2-  
406 phenylindole (DAPI) (Vectashield; Vector Lab, Burlingame, CA, USA). Slides were stored in the  
407 dark at -20°C until imaging.

## 408 **Imaging**

409

410 All imaging was completed using an Axio Scope A1 microscope (Zeiss; Thornwood, NY,  
411 USA). Regions of interest were identified via DAPI staining using a 10x objective with the  
412 assistance of the Paxinos and Watson brain atlas [40] and then imaged under a 40x objective  
413 (actual magnification ~900 X). Images were taken for both DAPI and FITC stains and later  
414 colorized and merged automatically using a custom macro in the ImageJ software with FIJI (NIH,  
415 Bethesda, MD). Due to tissue damage occurring over the course of *in situ* not all sections or areas  
416 of potential interest were viable. As such, images were not able to be z-stacked reliably and,  
417 instead, were taken on a single plane. The following regions were imaged and counted: the  
418 prelimbic cortex (+3.72 to +2.52 from bregma), the infralimbic cortex (+3.52 to +2.2 from bregma),  
419 the lateral (+3.72 to +3.2 from bregma) and ventral (+3.72 to +3.0 from bregma) orbitofrontal  
420 cortex, the CG1 region of the anterior cingulate cortex (+3.72 to +2.52 from bregma), and the CA3  
421 region of the ventral hippocampus (-4.3 to -4.8 from bregma) (See Fig 3). Though the amygdalar  
422 nuclei were also of particular interest for their well-established role in fear learning, the  
423 aforementioned tissue damage tended to be particularly severe in this area. As such, we were  
424 not able to obtain a sample size large enough to include that region (a minimum of 6 viable  
425 images/region was required for a rat to be included in the statistical analysis of a given area).

426 Counts were completed region by region and all image files were assigned a random  
427 numerical code to blind the experimenter completing the counts from any details concerning the  
428 image at the time of counting. All cell counts were taken in ImageJ with the FIJI package and  
429 were made using the cell counting tool. Cells were counted for nuclear and cytoplasmic *Arc* mRNA  
430 expression separately and cells showing overlapping expression were counted as dual  
431 expressing. The final counts for nuclear *Arc* expressing and cytoplasmic *Arc* expressing cells  
432 included only those cells expressing in only that region (i.e., did not include dual expressing cells).  
433 Full counts for DAPI stained cells were taken and the percent of cells showing expression in each

434

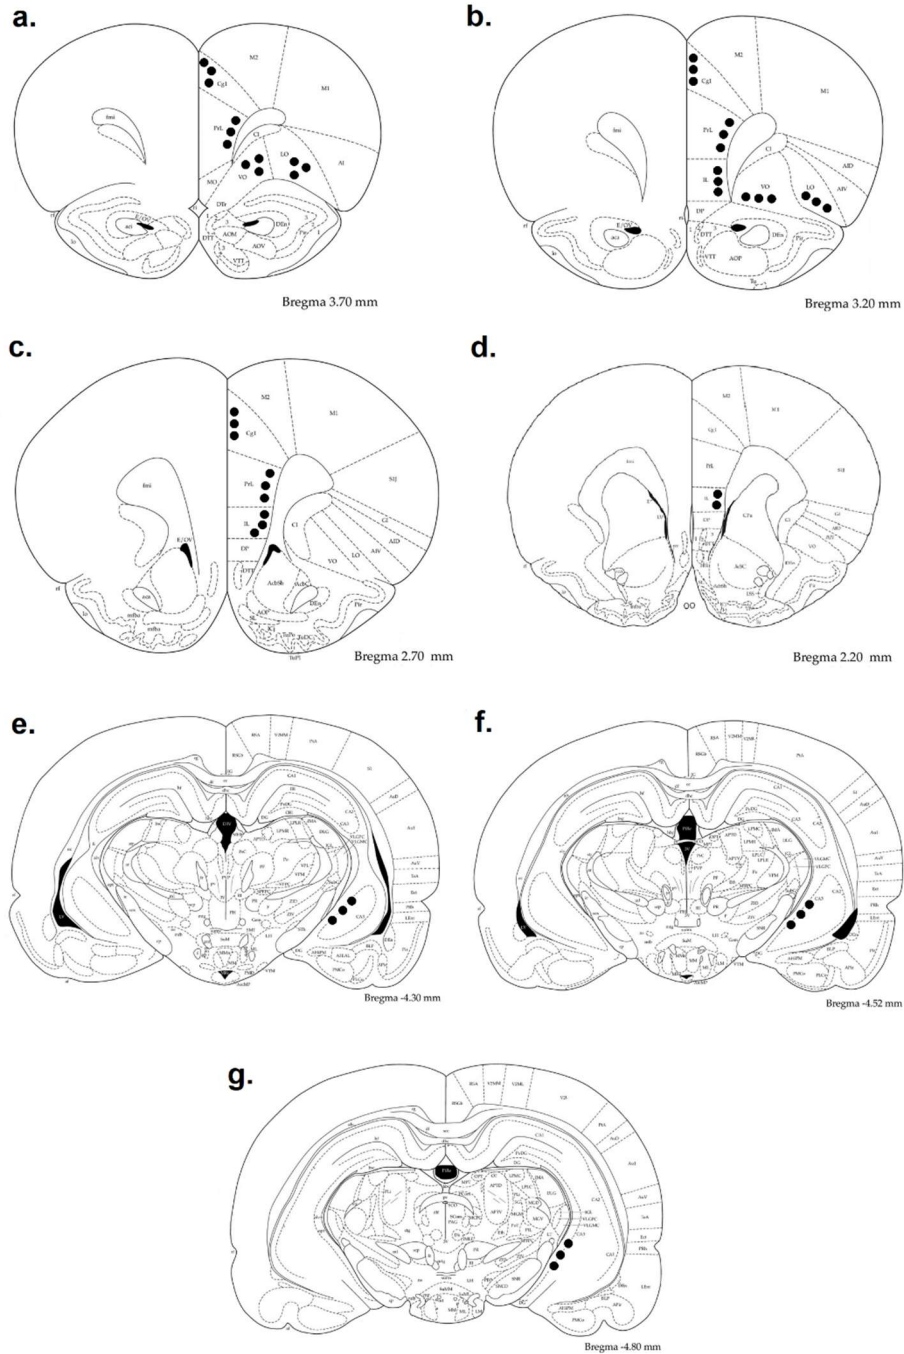

**Fig 3. Representation of sampled areas.** Images of coronal rat brain sections adapted from Paxinos and Watson (2006). The blacked-out circles indicate the approximate areas sampled from each plane for (a-d) the prelimbic, infralimbic, CG1 region of the anterior cingulate cortex, and the ventral and lateral orbitofrontal cortices, and (e-g) the CA3 region of the ventral

435 given area was calculated followed by the average percent of cells showing each type of activation  
436 in individual rats. To prevent the scores of rats with larger numbers of images from having a  
437 disproportionate effect on our statistics and to prevent an inflation of sample size only these  
438 averages were used in our final analysis.

## 439 Results

440  
441 All statistical analyses were completed using the R coding software. The full code is freely  
442 available to view at our data repository at  
443 <https://dataverse.tdl.org/dataverse/MonfilsFearMemoryLab>. Unless otherwise stated, the cutoff  
444 for a test to be considered statistically significant was set to  $p < 0.05$ .

## 445 Behavioral Results

### 446 Dominance tests results

447  
448 As only Cohort 2 rats were assigned conditions based on dominance rank, Cohort 1 males  
449 were not included in these analyses, resulting in data from nine triads ( $n = 27$  rats) being included.  
450 To verify our dominance assignments, we ran a two-way ANOVA (Type 2) with the percent of  
451 total nape contacts in the cage received as the dependent variable and engaging rat rank and  
452 responding rat rank as independent variables. The interaction had to be tested separated using  
453 a one-way ANOVA. We found an overall effect of both engaging ( $F_{(2,49)} = 16.409$ ,  $p < 0.0001$ ) and  
454 responding ( $F_{(2,49)} = 19.490$ ,  $p < 0.0001$ ) rank and an interaction between the two ( $F_{(5,48)} = 9.84$ ,  $p$   
455  $< 0.0001$ ). A post-hoc Tukey HSD found that, as expected, dominant ( $p = 0.0082$ ) and S1 ( $p =$   
456  $0.043$ ) were significantly more likely to engage than S2 rats, and dominants were more likely to  
457 be the responder when compared to both S1 ( $p = 0.0031$ ) and S2 ( $p = 0.002$ ) rats. S1 rats were  
458 also significantly more likely to contact the dominant rat than the S2 rat ( $p = 0.00031$ ). We also

459 examined the percent of times a rat responded to a nape contact with a counter, a behavior that  
460 has previously been found to be more likely in dominant rats [37]. Differences in likelihood of  
461 counter response was tested using a series of Kruskal-Wallis tests due to violations of ANOVA  
462 assumptions. We found that while there was no detected effect of engaging rank ( $H_2 = 3.23$ ,  $p =$   
463  $0.199$ ) there was a significant effect of responding rank ( $H_2 = 7.92$ ,  $p = 0.0191$ ) and a post-hoc  
464 Dunns test with Holm's p-adjustment found that dominant assigned rats did counter significantly  
465 more than rats assigned to the S1 condition ( $p = 0.0162$ ) but not rats assigned to the S2 condition  
466 ( $p = 0.156$ ). A mixed-effects ANOVA run to examine performance during the milk dominance  
467 assessment with percent of time monopolizing the milk cup as the dependent variable, assigned  
468 rank as the between-subjects variable, and minute of scoring as the within-subjects variable. We  
469 found a significant overall effect of rank ( $F_{(2,24)} = 4.83$ ,  $p = 0.0172$ ) but no effect of minute ( $F_{(9,216)}$   
470  $= 0$ ,  $p > 0.99$ ) and no interaction between the two ( $F_{(18,216)} = 1.189$ ,  $p = 0.272$ ). Post-hoc pairwise  
471 comparisons across the various ranks averaged across minute found that S1 ranks rats spent  
472 significantly more time monopolizing the milk cup than S2 rats ( $p = 0.0165$ ) and dominant rats  
473 also trended in that direction ( $p = 0.09$ ), but there was no significant difference between dominant

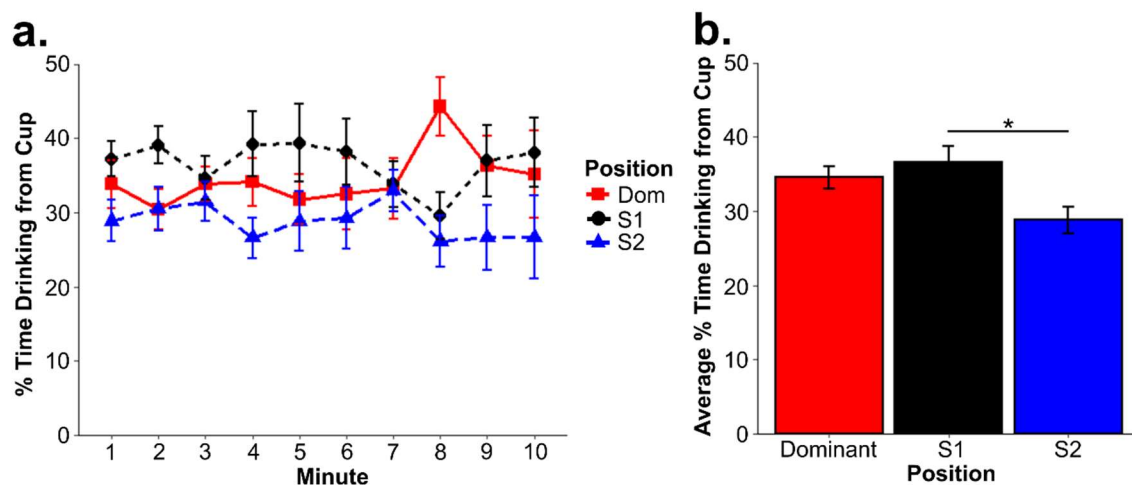

**Fig 4. Milk dominance test results.** The above figures show the average percent of total time that rats assigned a given rank spent monopolizing the milk cup (a) across the first ten minutes of the dominance test and (b) averaged across each minute by rank.  $*p < 0.05$

474 rats and S1 rats ( $p = 0.713$ ) (see Fig 4). Notably, these results are counter to earlier findings from  
475 our lab [13], which might be attributable to differences in the container used to hold the milk during  
476 testing as the lid of our container was slightly wider (4.45 cm Diameter vs. 3.75 cm diameter)  
477 making the milk more easily accessible.

## 478 **Fear conditioning and fear conditioning by-proxy**

479  
480 To ensure that Demonstrators had sufficiently acquired the CS-US association, their  
481 freezing on day 2 (during the FCbP observation period) was run through a one-way within-  
482 subjects ANOVA with timepoint (pre-CS, CS1, CS2, and CS3) as the within-subjects factor. We  
483 found a significant effect of cue ( $F_{(3,87)} = 77.96$ ,  $p < 0.0001$ ) and a post-hoc pairwise testing using  
484 a Bonferroni adjustment for multiple comparisons confirmed that freezing during the CS was  
485 significantly higher than at baseline (all  $p < 0.001$ ) (see Fig 5a). A set of Kruskal-Wallis analyses  
486 were run on freezing on to the CS presentation on the terminal day (day 4) of the experiment as  
487 a nonparametric alternative to an ANOVA due to violations of ANOVA assumptions by the  
488 untransformed dependent variable. Kruskal-Wallis analyses were run on sex, experimental  
489 condition, and a factor containing all combinations of the two (to detect potential interactions) as  
490 independent variables. It found that while there was no overall effect of sex ( $H_1 = 1.55$ ,  $p = 0.2132$ )  
491 on its own, there was a significant effect of experimental condition ( $H_2 = 35.1$ ,  $p < 0.0001$ ) and a  
492 significant effect of the combined factors ( $H_5 = 37.38$ ,  $p < 0.0001$ ). Post-hoc Dunn's tests using  
493 the Holm adjustment for multiple comparisons found that rats in the Demonstrator condition froze  
494 significantly more to the CS than both Observers ( $p < 0.0001$ ) and Controls ( $p < 0.0001$ ), but,  
495 surprisingly, Observers and Controls did not significantly differ in their freezing from each other  
496 ( $p = 0.814$ ). Dunn's testing on the combined sex and condition variable found that the overall  
497 effect detected via Kruskal-Wallis was driven entirely by the Demonstrator condition, i.e., no  
498 interaction effects were detected (see Fig 5b). Notably, our Demonstrators also displayed an  
499 unusually low percentage of freezing to this final CS (mean = 25.2) that we were unable to



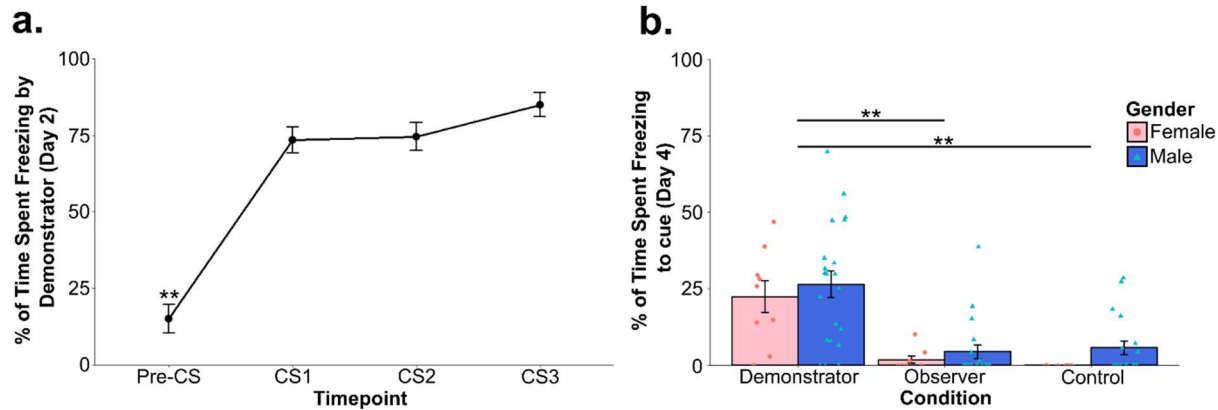

**Fig 5. Fear conditioning and fear conditioning by-proxy behavioral results.** The above figures show the average percent of total time that rats froze during or prior (Pre-CS) to the CS presentation for (a) Demonstrators on day 2, during FCbP interactions and (b) all rats to the single CS presentation on the terminal day of the experiment.  $**p < 0.005$

500 replicate using near identical behavioral procedures (see Supporting Information methods). We  
501 did, however, confirm that the Demonstrators' freezing during the CS period was not just context  
502 based by using a Wilcoxon signs-rank test (due to violation of the assumption of normality  
503 because of a floor effect for pre-CS freezing) to compare freezing during the CS to their freezing  
504 prior to CS presentation ( $Z = 49$ ,  $p = 0.0013$ ). That Observer rats did not show higher freezing  
505 than Control rats during the final CS presentation, while somewhat concerning, is likely the result  
506 of our using only a single CS presentation. While past research in our lab has found that FCbP  
507 observer rats will freeze over controls on the first CS presentation of a long-term memory test  
508 [12], there were some methodological changes (pre-exposure of controls to the CS and rats being  
509 run during their dark cycle) that resulted in slight changes in behavior. This was confirmed in a  
510 follow-up experiment run under similar conditions where we ran a full three CS recall test (see  
511 Supporting Information text).  
512



## 513 **Choice test/food tasks**

514

515 Choice test performance using either percent of time spent interacting the food cup  
516 containing diet Cin or percent of all eaten that was diet Cin was compared between Demonstrators  
517 and Observers using a two-sample t-test. We found no significant difference between the two  
518 groups on time spent at the diet Cin food cup ( $t_{31} = 0.97$ ,  $p = 0.3404$ ) or on the percent of total  
519 eaten that was diet Cin ( $t_{31} = 0.74$ ,  $p = 0.4636$ ). To determine whether this lack of an effect was  
520 due to both groups showing a preference for diet Cin, we ran a set of one-sample t-tests  
521 comparing the percent of total eaten that was diet Cin against the case in which rats showed no  
522 preference for either diet ( $\mu = 50$ ). We found that while both Demonstrator ( $t_{16} = 2.204$ ,  $p =$   
523  $0.04265$ ) and Observer ( $t_{16} = 3.105$ ,  $p = 0.0068$ ) rats showed a significant preference for the diet  
524 Cin based on the percent eaten, neither Demonstrators ( $t_{16} = 0.476$ ,  $p = 0.641$ ) nor Observers ( $t_{15}$   
525  $= 1.885$ ,  $p = 0.079$ ) spent significantly more time interacting with the diet Cin food cup (see Fig  
526 6a,b). The lack of difference between Observers and their Demonstrators can likely be explained  
527 by: (1) a slight innate preference for diet Cin over diet Co, as past research in our lab has found  
528 in Sprague-Dawleys [14], and (2) our decision to only use diet Cin as the demonstrated flavor in  
529 an attempt to decrease variance in the behavioral experience of our observers and (3) the brevity  
530 of the choice test compared to our standard design (10 minutes vs 1 hour). It is also worth noting  
531 that the Cohen's d effect size for the Observer's preference towards cinnamon ( $d = 0.75$ ) is larger  
532 than the effect size calculated for Demonstrators ( $d = 0.53$ ), though both fall into the category of  
533 medium effect sizes. Finally, to determine whether experimental condition influenced the total  
534 amount of food eaten, we ran a two-way ANOVA with total grams of food eaten during the choice  
535 as the dependent variable and experimental condition and sex as the independent variables. We  
536 found that while, as expected, there was a significant effect of sex ( $F_{(1,82)} = 35.66$ ,  $p < 0.0001$ )  
537 (see Fig 6c) with females eating less than males, there was no significant effect of experimental

538 condition ( $F_{(2,81)} = 0.334$ ,  $p = 0.717$ ) (see Fig 6d) and no interaction between the two ( $F_{(2,81)} = 1.02$ ,  
539  $p = 0.365$ ).

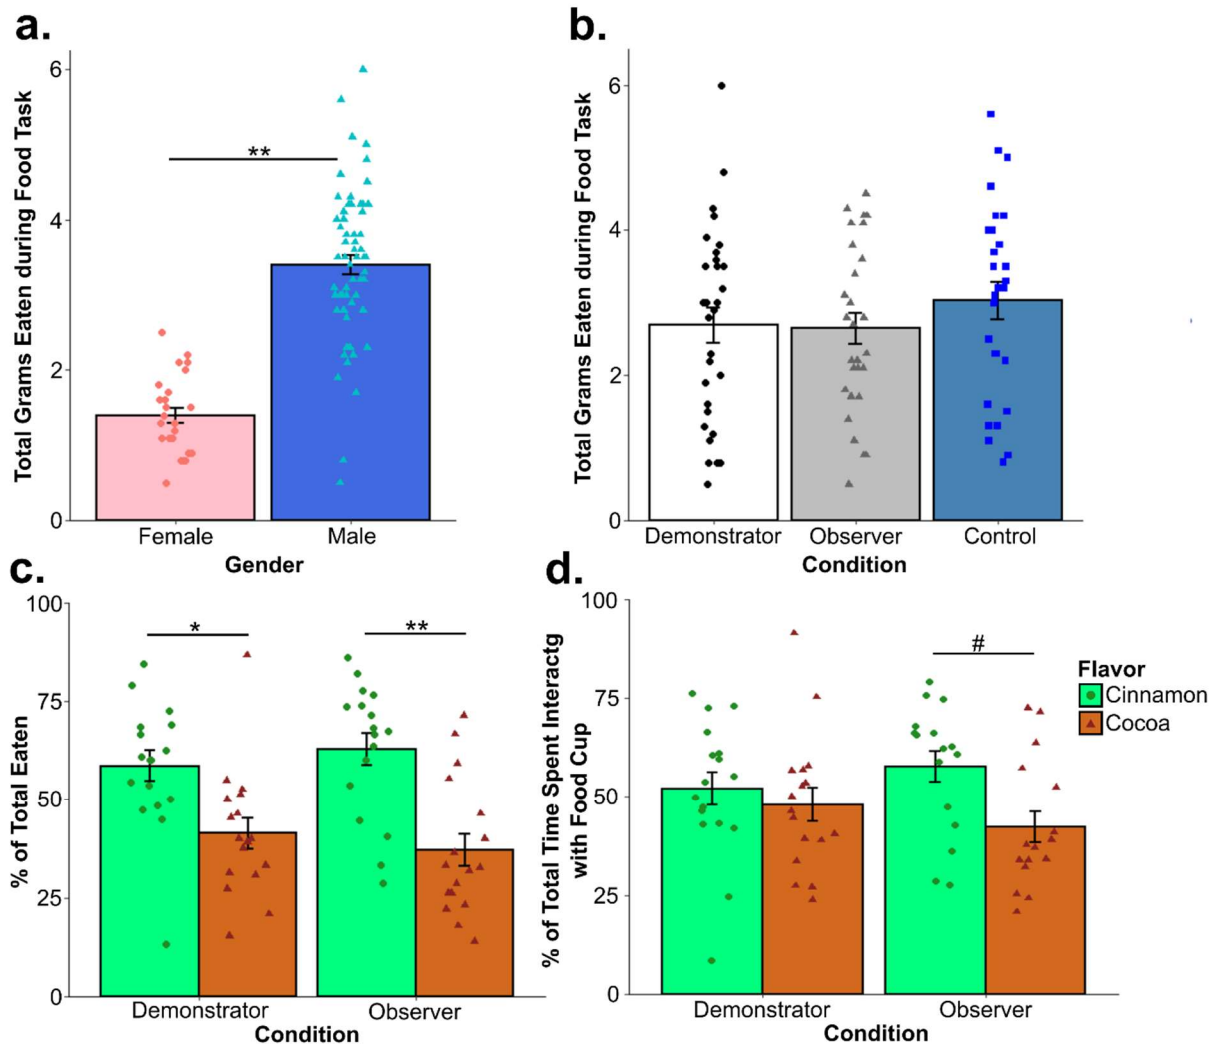

**Fig 6. Day 4 food task behavioral results.** For rats that went through the choice test on the final day of experimentation, we found that (a) while Observers and Demonstrators did not differ significantly from each other in the percent of diet Cin (the demonstrated flavor) eaten, they did both show a significant preference for the diet. However, (b) neither group spent significantly more time interacting with the food cup containing diet Cin. Examining the total amount eaten during the final food task for all rats we predictably found that (c) females overall ate significantly less than males but (d) experimental condition has no overall effect on the total amount eaten. # $p < 0.1$ , \* $p < 0.05$ , \*\* $p < 0.01$

## 540 **Arc Results**

### 541 **Arc Statistical analysis overview**

542  
543 All of our *Arc* results, unless otherwise mentioned, were tested for significance using a  
544 series of two-way ANOVAs (type 2) containing sex and condition as between subject variables  
545 (Sex and Condition) with an individual ANOVAs run for each area of expression (nucleus,  
546 cytoplasm, and dual). Similarly, a series of one-way ANOVAs were run with a combined variable  
547 containing the food task (diet Cin only or Choice test for Demonstrators and Observers; plain  
548 chow only for all Controls) for each area of expression. Sex was not included as a secondary  
549 variable as the relatively low number of female rats made sample sizes too small for certain  
550 condition/food task combinations. When ANOVA assumptions were violated, data were  
551 transformed using either a  $\log(y+1)$  function or by taking the inverse square root. As these  
552 transforms did not always succeed in bringing ANOVAs in line with assumptions, Kruskal-Wallace  
553 tests were performed on datasets where transforms were not effective. Pairwise t-tests were  
554 performed for post-hoc analyses against a Bonferroni-corrected alpha value when ANOVAs  
555 indicated a significant effect of condition ( $\alpha = 0.017$ ) or a significant sex and condition interaction  
556 ( $\alpha = 0.008$ ; conditions tested against each other within each sex only) with between-group effect  
557 sizes calculated using Cohen's  $d$ . To provide a better gauge of variability for our smaller group  
558 sizes, the  $MS_{\text{Error}}$  obtained from our ANOVA was used in the denominator of post-hoc t-tests.  
559 Effect sizes for ANOVAs were calculated using the standard partial  $\eta^2$  formula and for Kruskal-  
560 Wallace tests using the formula  $\eta^2_{\text{H}} = (H - k + 1)/(n - k)$ . For simplicity of data presentation, unless  
561 the addition of the food task grouping variable resulted in a significant effect or unless a significant  
562 contribution of sex was detected all data were presented graphically split up by area of expression  
563 and overall experimental condition only. Any rats that had fewer than 6 viable images counted in  
564 a given brain region were excluded from the analysis for that area.

565           Bivariate correlations were calculated for Observer and Demonstrator animals to assess  
566 potential relationships between behavioral measures and *Arc* cell counts for expression occurring  
567 at appropriate timepoints (e.g., cytoplasmic *Arc* counts for percent of cinnamon eaten). Pearson's  
568 correlation coefficients were used in the event that no outliers in either dataset were detected with  
569 a Grubbs test; if outliers were detected, Spearman's correlation coefficient was used instead. To  
570 gauge whether a relationship between social learning and *Arc* in dual expressing cells in  
571 Observers, an overall metric of social learning – referred to from here on out as the social learning  
572 metric (SLM) - was calculated take the mean of the z-score standardized scores for the  
573 percentage of total eaten that was the demonstrated food and the percentage of time spent in  
574 contact with the Demonstrator during the FCbP social learning phase during the CS presentation  
575 (males) or after the CS presentation (females). Notably, percent freezing to the cue on the final  
576 day was not used for Observer rats because our results and the results of our follow up experiment  
577 (see Supporting Information data) indicated that the conditions of our behavioral testing procedure  
578 resulted in some freezing behavior even in Control rats – at least in males - and, as such, might  
579 not be the best gauge of the strength of the socially acquired fear response. As such, given our  
580 past findings that interactions with the Demonstrator during or after the CS (depending on sex)  
581 highly predicted later freezing to the cue [12–14], interaction with the Demonstrator at the sex  
582 appropriate timepoint was tested for correlations against nuclear *Arc* activity rather than freezing  
583 to the cue on the final day for Observer rats. For Demonstrators, a similar metric was calculated  
584 based on standardized freezing to the cue on the final day and the percent of total eaten that was  
585 the familiar diet (Diet Cin) and checked against dual *Arc* activity. To correct for the multiple tests  
586 run on each behavioral dataset (6, for each brain region), the critical p-value for correlations was  
587 Bonferroni adjusted to 0.0083.

## 588 **Arc Results**

589 (An overview of statistical results for each area can be found in S1-S4 Tables)

590

591 No significant effect of condition and no interaction between sex and condition was  
592 detected in the vCA3, infralimbic cortex, anterior cingulate cortex, or the lateral and ventral  
593 orbitofrontal cortex (all  $p > 0.05$ ) (see Fig 7). Additionally, none of the one-way ANOVAs found a  
594 significant effect of condition when rats were further separated based on the food task they were  
595 assigned in any of these areas or in the prelimbic cortex (all  $p > 0.1$ ). An overall effect of sex was  
596 found in a number of regions including: nuclear *Arc* expression in the ventral orbitofrontal cortex  
597 ( $F_{(1,64)} = 4.851$ ,  $p = 0.031$ ;  $\eta^2_{\text{partial}} = 0.07$ ); dual expressing cells in the lateral orbitofrontal cortex  
598 ( $F_{(1,57)} = 6.18$ ,  $p = 0.016$ ,  $\eta^2_{\text{partial}} = 0.094$ ); nuclear ( $F_{(1,69)} = 35.470$ ,  $p < 0.001$ ,  $\eta^2_{\text{partial}} = 0.325$ ),  
599 cytoplasmic ( $F_{(1,69)} = 60.715$ ,  $p < 0.0001$ ,  $\eta^2_{\text{partial}} = 0.463$ ), and dual expressing ( $F_{(1,69)} = 9.84$ ,  $p =$   
600  $0.003$ ,  $\eta^2_{\text{partial}} = 0.124$ ) cells in the vCA3 of the hippocampus; dual expressing cells in the CG1  
601 region of the anterior cingulate cortex ( $F_{(1,66)} = 15.930$ ,  $p < 0.001$ ,  $\eta^2_{\text{partial}} = 0.194$ ); in nuclear  
602 expressing cells ( $F_{(1,73)} = 18.05$ ,  $p < 0.001$ ,  $\eta^2_{\text{partial}} = 0.196$ ) and dual expressing cells ( $F_{(1,73)} =$   
603  $13.666$ ,  $p < 0.001$ ,  $\eta^2_{\text{partial}} = 0.15$ ) in the infralimbic cortex (see Fig 8); and in cytoplasmic  
604 expressing cells ( $H_1 = 4.3$ ,  $p = 0.038$ ,  $\eta^2_{\text{H}} = 0.045$ ) and dual expressing cells ( $F_{(1,70)} = 18.11$ ,  $p <$   
605  $0.001$ ,  $\eta^2_{\text{partial}} = 0.203$ ) in the prelimbic cortex (see Fig 9b,c). Female rats displayed higher *Arc*  
606 counts than males in areas other than the anterior cingulate, infralimbic, and prelimbic cortices,  
607 in which male counts were higher across all conditions. Notably, post-hoc analyses found no  
608 overall significant effect of condition within the *Arc* counts for across any of the tested regions or  
609 areas of cell expression (all  $p > 0.1$ ). The two-way ANOVA examining nuclear expression in the  
610 prelimbic cortex found a significant interaction effect between sex and experimental condition  
611 ( $F_{(2,70)} = 3.96$ ,  $p = 0.023$ ,  $\eta^2_{\text{partial}} = 0.102$ ). Post-hoc testing found a significant difference between  
612 nuclear *Arc* expression in female Demonstrators and female Controls only ( $t_{9,7} = 3.9$ ,  $p = 0.0032$ ,  
613  $d = 1.22$ ) (see Fig 9a). Correlational analyses found a significant negative relationship between  
614 the SLM score of Observer rats and the percent of cells showing dual *Arc* expression in the ventral  
615 orbitofrontal cortex ( $t_{10} = -3.41$ ,  $p = 0.0066$ ,  $r = -0.73$ ) (see Fig 10a). Follow up analyses confirmed

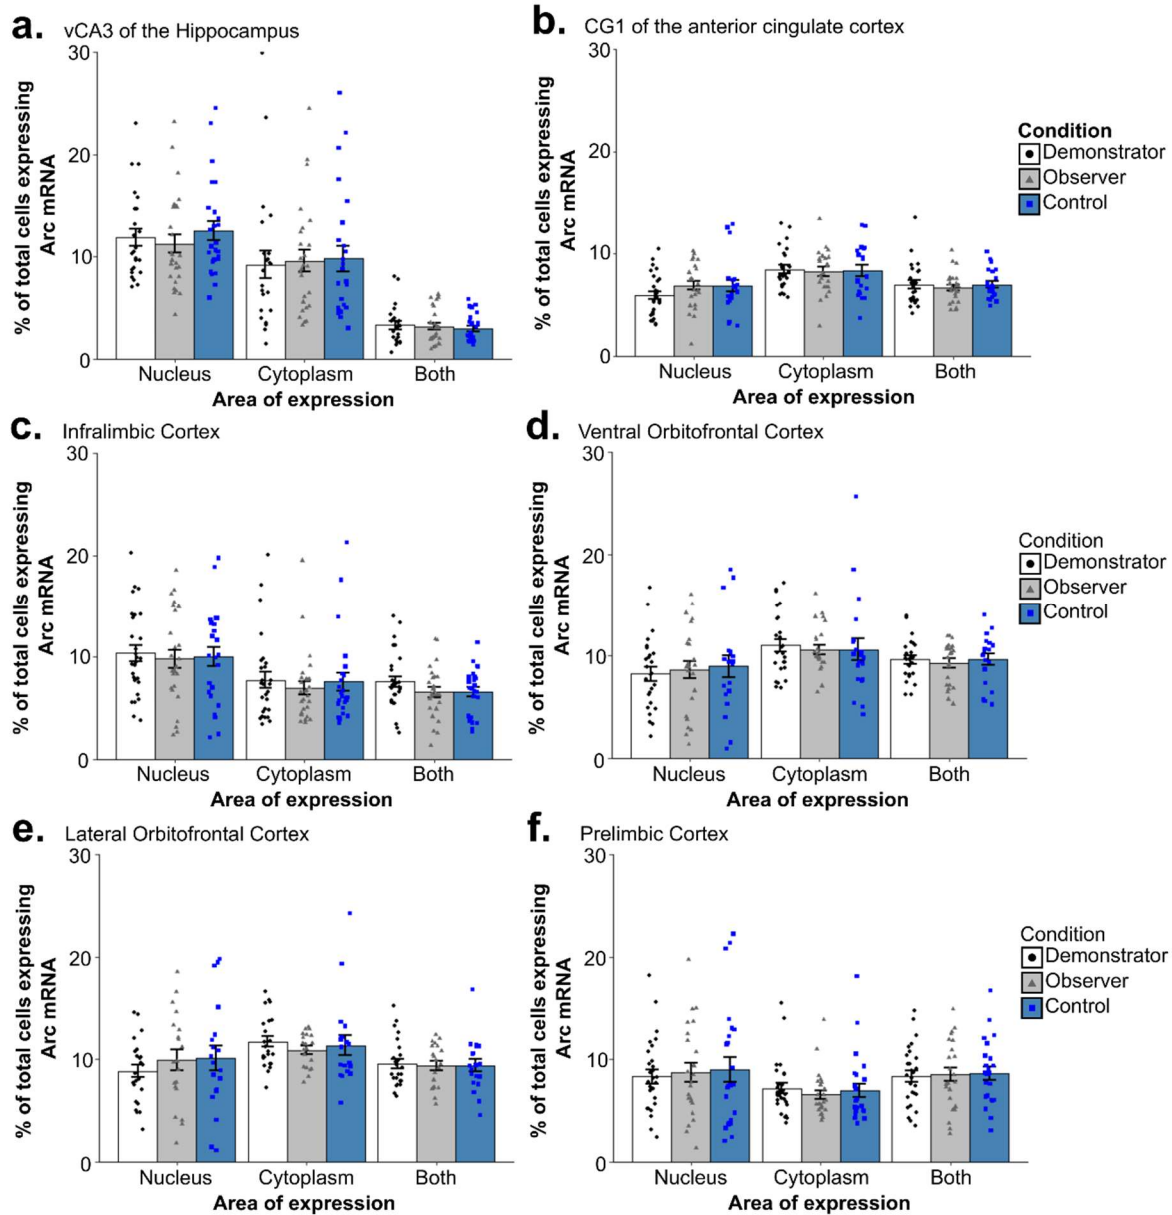

**Fig 7. Arc counts across primary experimental condition.** The above graphs show the percent of total DAPI stained cells that displayed *Arc* expression in the nucleus, cytoplasm, or in both area (dual) across the primary experimental conditions in (a) the vCA3 of the hippocampus, (b) the CG1 region of the anterior cingulate cortex, (c) the infralimbic cortex, (d) the ventral orbitofrontal cortex, (e) the lateral orbitofrontal cortex, and (f) the prelimbic cortex. Across all regions and areas of cell expression examined, no group differences were found between any of the conditions (all  $p > 0.1$ ).

617

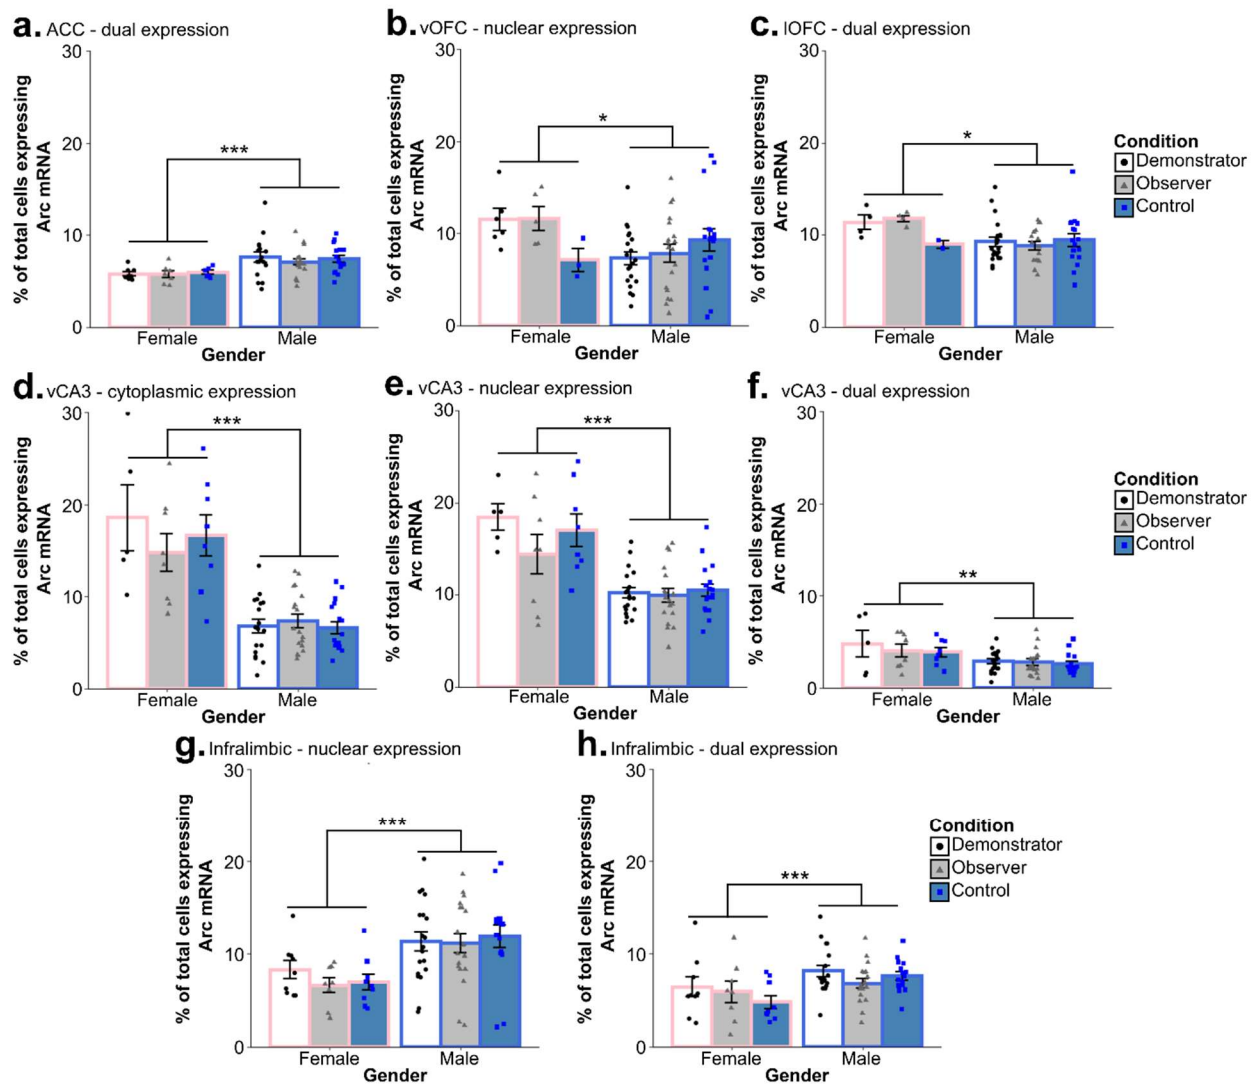

**Fig 8. Differences in Arc expression between male and female rats.** Significant differences in Arc expression were between male and female subjects when comparing (a) dual Arc expression in the CG1 region of the anterior cingulate cortex, (b) nuclear Arc expression in the ventral orbitofrontal cortex, (c) dual expression in the lateral orbitofrontal cortex, (d) cytoplasmic, (e) nuclear, and (f) dual Arc expression in the vCA3 of the hippocampus, and (g) nuclear and (h) dual Arc expression in the infralimbic cortex.

+ $p < 0.1$ , \* $p < 0.05$ , \*\* $p < 0.01$ , \*\*\* $p < 0.001$



618

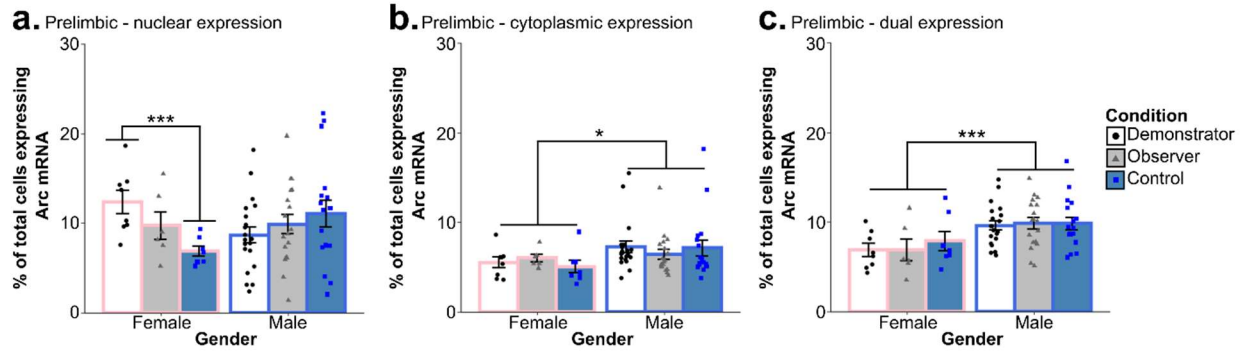

**Fig 9. Differences in *Arc* expression between male and female rats across the prelimbic cortex.** While initial ANOVA analysis found a significant sex and condition interaction in (a) the nuclear prelimbic counts, with female Demonstrators showing significantly more *Arc* expression than female Controls. Females did show lower overall (b) cytoplasmic and (c) dual *Arc* expression as compared to males in the prelimbic cortex, however. \* $p < 0.05$ , \*\*\* $p < 0.001$

619

620

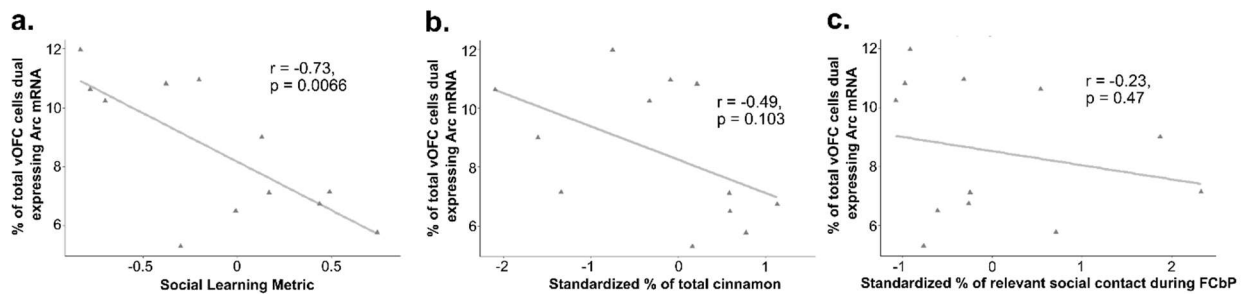

**Fig 10. Relationship between social learning measures dual *Arc* expression in the vOFC.**

(a) A significant negative relationship was found between a social learning metric calculated by summing standardized measures of social acquisition of the STFP and socially acquired fear association in Observers and the percent of *Arc* dual-expressing cells in the ventral orbitofrontal cortex. This relationship was not significant when looking at either (b) the standardized measure of STFP or (c) the standardized measure of socially acquired social contact during FCbP – used as a proxy for social fear learning – alone. Notably, both male and female animals were included in this dataset.



621 that this relationship was not significant when looking at either the standardized measure of  
622 percent cinnamon eaten ( $t_{10} = -1.795$ ,  $p = 0.103$ ,  $r = -0.49$ ) or the standardized measure of sex  
623 relevant contact during FCbP ( $t_{10} = -0.75$ ,  $p = 0.47$ ,  $r = -0.23$ ) alone (see Fig 10b,c). All other  
624 correlational analyses were not significant beyond our Bonferroni corrected alpha value (all  $p >$   
625 0.01).

## 626 Discussion

627  
628 Contrary to our expectations, our results did not show any differences in *Arc* expression  
629 following long term memory recall based on whether the subject had acquired reward- and fear-  
630 based information by means of direct learning or social learning. Even more puzzlingly, Control  
631 rats that were put through analogous behavioral procedures prior to euthanasia but that had not  
632 been through any explicit fear- or reward-based training did not differ in *Arc* expression across  
633 the CG1 region of the ACC, the infralimbic cortex (IL), the vCA3 of the hippocampus, or the ventral  
634 or dorsal orbitofrontal cortex (OFC) when compared Demonstrators or Observers. Overall, the  
635 only differences in *Arc* expression that were detected were driven by subjects' sex and showed  
636 no interaction with experimental condition. Though it is true that recall processes may not  
637 necessarily induce as many of the long-term changes in neural activity and connectivity that *Arc*  
638 is thought to be involved in [41] as learning procedures do, past research has found certain recall  
639 procedures to be sufficient to induce increased *Arc* activity [42,43]. As such, the lack of an effect  
640 across conditions that we see cannot be attributed only to our choice to examine learning at the  
641 recall timepoint. In the following sections, we will first examine our overall findings in the context  
642 of past research into the brain mechanisms underlying recall processes in the STFP paradigm,  
643 fear-conditioning and observational fear-conditioning procedures, and our findings in the ventral  
644 orbitofrontal cortex in the context of past research. We will then cover our findings – and,

645 importantly, the limitations around our ability to interpret these findings – on sex effects on *Arc*  
646 expression.

## 647 ***Arc* in the recall of a socially transmitted food preference**

648  
649 Past research examining expression of the IEG c-Fos has found that a number of the  
650 areas we examined, specifically the orbitofrontal cortex, vCA3, infralimbic cortex, and the  
651 prelimbic cortex [22,23] show activation at the 48 hour recall timepoint for a socially transmitted  
652 food preference. It is also notable that these results from Smith et al. [23] were obtained using the  
653 same STFP control paradigm as was used in this study, indicating that though STFP recall  
654 induced activity in these regions may have been detectable with c-Fos, this may not be the case  
655 at this timepoint when examining *Arc*. This interpretation is backed up by the findings of Pilarzyk  
656 et al. [43], who examined *Arc* mRNA activity following STFP recall in Pde11a knockout mice,  
657 which displayed impaired recent STFP and enhanced remote STFP compared to Pde11a wild-  
658 type controls. They found that both animals showed increases in *Arc* expression over home-cage  
659 controls at this timepoint in the ventral and dorsal CA1, the ventral and dorsal subiculum, and in  
660 the CG1 and CG2 of the ACC. Moreover, while Pde11a knockout mice showed decreased *Arc*  
661 expression following a recall procedure for a recently acquired (24 hours post) STFP memory  
662 when compared to Pde11a wild-types in the vCA1, no difference between the two genetic lines  
663 was evident in any of the other regions examined. At a more remote recall timepoint (7 days post),  
664 knockout animals showed higher *Arc* activity post-recall in the CG1 and CG2 of the ACC but not  
665 in the vCA1 as compared to the wildtype controls, with home cage animals showing no baseline  
666 difference regardless of genetic line. Given that these differences in ACC *Arc* activity were not  
667 observed during early recall and the differences in vCA1 *Arc* activity was not seen during remote  
668 recall, it is reasonable to assume that this *Arc* activity was specific to both the experience of STFP  
669 recall and the recall timepoint. These findings are particularly interesting in light of prior research

670 examining c-Fos activity in the vCA1 and the ACC at the respective timepoints at which enhanced  
671 *Arc* activity was seen in these animals, as past studies have found no differences in c-Fos activity  
672 in these areas when recall was induced on the exact same timeframe [22,23]. With this in mind,  
673 it is perhaps unsurprising that we also observed no recall induced changes in *Arc* expression in  
674 the various regions we examined despite their consistently being shown to be active using c-Fos  
675 as an activity marker. Exactly what the implications of this are - outside of the obvious conclusion  
676 that not all IEGs are equal – is hard to say when working with mostly null findings. That said, the  
677 high sensitivity of cellular compartment analysis of temporal activity by fluorescence *in situ*  
678 hybridization (catFISH) and our large group sizes for the primary behavioral conditions  
679 (Demonstrator, Observer, and Control) does lend validity to the non-significance of our findings.  
680 One caveat to our design that future experimenters might want to consider is the possibility that  
681 Demonstrators may also have acquired a STFP simply through exposure to the scent of the  
682 consumed food on their own breath and carbon disulfide from the nasal cavity of the Observer  
683 with whom they were interacting.

## 684 ***Arc* in the recall of direct and socially acquired fear**

### 685 **associations**

686  
687 Our ability to interpret our findings regarding our rats undergoing recall of fear acquired  
688 via direct learning is significantly aided by how well-characterized the system underlying fear  
689 learning and recall is. A number of the areas we examined are well established as being involved  
690 in fear or extinction learning (the latter of which we would assume to be initiated in Demonstrators,  
691 as they had undergone non-reinforced CS presentation during FCbP) specifically the ACC, the  
692 prelimbic cortex, and the infralimbic cortex [30–32,44]. Though a much smaller pool of research  
693 is available regarding the neural mechanisms of social fear, the proposed models of social fear  
694 learning posit a system similar to that underlying recall of directly acquired fear associations also

695 underlies the fear learning and recall processes for social fear learning [28]. Our findings indicate  
696 no overall role of the ACC, prelimbic cortex (PL), or IL in either recall of a socially acquired fear  
697 association or a directly acquired fear association (though see also discussion of sex differences  
698 in PL activity below). However, as covered in the previous section, this likely just indicates that  
699 *Arc* does not serve as a reliable indicator of activity in this case. Examination of these areas post-  
700 fear acquisition would likely tell a different story. Though explicit research in *Arc* activity following  
701 fear recall is limited, there is some past research to draw from. Chia & Otto [42] found that when  
702 *Arc* protein expression was examined following the presentation of a CS that a rat had acquired  
703 a fear association for via trace fear conditioning (i.e., fear conditioning with a delay between CS  
704 termination and shock delivery) rats were found to have significantly higher *Arc* expression in both  
705 the dorsal and ventral hippocampus when compared to unconditioned controls that were exposed  
706 to the chamber but not the CS. Notably, *Arc* was quantified by Western Blot analysis of the  
707 homogenized ventral and dorsal HPC in this experiment, so precise localization of HPC activity  
708 was not available. These findings likely indicate that, like in STFP, *Arc* transcription might be  
709 induced in certain areas of the hippocampus at the 48-hour recall timepoint for a cued fear  
710 memory.

## 711 **Potential Role of the Ventral Orbitofrontal Cortex in Recall of** 712 **Socially Acquired Information**

713  
714 In a landmark study, Lesburguères et al. [24] were able to demonstrate that while dorsal  
715 hippocampal (dHPC) activity was necessary for acquisition and short-term recall of an acquired  
716 STFP, the STFP memory was eventually offloaded to the OFC for long-term storage. Additionally,  
717 Lesburguères et al. were able to demonstrate that that tagging of neurons in the orbitofrontal  
718 cortex during STFP acquisition is necessary for long-term storage of socially transmitted food  
719 preferences and that interference with the OFC activity following acquisition impairs remote

720 memory recall (30 days post-acquisition) (though see also [45]). These findings would suggest  
721 ongoing communication between the dHPC and the OFC in the first days or weeks post-STFP  
722 acquisition and, furthermore, would suggest ongoing reorganization of the OFC at this timepoint  
723 to accommodate the long-term storage of the STFP memory. While the lack of overall differences  
724 in ventral or lateral OFC *Arc* expression between Demonstrators, Controls, and Observers in this  
725 study would challenge that interpretation somewhat, we did detect a significant negative  
726 correlation between our combined measure of overall social learning performance and dual-*Arc*  
727 expressing cells in the vOFC. Furthermore, this correlation was not observed between a similar  
728 metric formed for Demonstrators based on their choice test performance and their freezing to the  
729 cue. As reliance on socially acquired information can be thought of as making the choice between  
730 potentially unreliable social information and the potential dangers of learning through direct  
731 experience, it is possible that this apparent inhibitory role of the vOFC on expression of socially  
732 acquired information might be connected to the OFC's broader role in value-based decision  
733 making [46–49].

## 734 **Sex Differences in *Arc* Transcription**

735  
736 Prior to this discussion, it should be stated that our ability to interpret our sex-related  
737 results is hindered for a number of statistical and methodological reasons. First, our occasionally  
738 low sample size for females, with group size for sex/condition combinations ranging from  $n = 2$  to  
739  $n = 9$  following removal of rats without enough viable sections (though notably an  $n < 5$  was only  
740 present for female Controls in the vOFC and IOFC and female Demonstrators and Observers in  
741 the IOFC). Additionally, our lack of entirely undisturbed controls means that we have no way to  
742 determine whether these sex differences are the result of baseline or task-specific differences in  
743 *Arc* mRNA production. Finally, because the pre-*in situ* PFA wash was not introduced until all  
744 female sections had been processed, it is possible that this difference in tissues processing might

745 have affected the overall stain. That said, if this were the case, we might expect to see a broader  
746 and more consistent effect of sex across regions and types of *Arc* expression (nuclear,  
747 cytoplasmic, and dual). As it is, 18 regions/cellular areas of *Arc* expression combinations are  
748 examined and only 10 display a significant overall effect of sex. Furthermore, this effect is not  
749 uniform in its direction, with males displaying greater overall *Arc* expression in 5 cases and  
750 females displaying greater expression in the other 5. Regardless, we feel that our findings here  
751 should serve only to inform possible future research into sex differences in *Arc* expression. As it  
752 is, the limitation of the current study would make drawing definitive conclusions regarding sex  
753 effects on *Arc* expression inappropriate. This should be kept in mind in reading the following  
754 discussion.

755         Although there has been little investigation into sex differences in *Arc* expression, there  
756 are some findings indicating that female rats may show higher levels of *Arc* expression in certain  
757 regions of the dorsal hippocampus following repeated exposure to a relatively enriched  
758 environment [50], though a trend in the opposite direction has also been observed in animals  
759 tested without prior behavioral intervention [50]. Our findings may indicate that sex differences in  
760 *Arc* transcription may be present following certain general behavioral tasks or experiences. In the  
761 CG1 region of the ACC we found that males, overall, had more cells active at both timepoints,  
762 possibly due to higher baseline *Arc* transcription in the ACC of males or increased transcription  
763 following context changes/re-exposure (home cage → STFP testing room → conditioning  
764 chamber) as there is some evidence – though limited – for a role of the ACC in long-term recall  
765 of contextual memories [51]. Male rats also displayed higher nuclear and dual *Arc* counts in the  
766 infralimbic (IL) cortex. It is possible that the higher IL *Arc* counts in males might be explained by  
767 the role of the infralimbic cortex in extinction and fear inhibition [31,52,53] and the well  
768 documented impairments in the inhibition and extinction of learned fear in females [54–56]. If this  
769 is the case, however, it does raise the question of why no overall differences were observed

770 between our Control, Observer, and Demonstrator animals if *Arc* expression was being triggered  
771 by CS-elicited infralimbic activity.

772 Females showed higher levels of *Arc* expression for all counts in the vCA3. The difference  
773 in nuclear counts could potentially have been the result of greater activation following exposure  
774 to the CS or re-exposure to the conditioning chamber in females, while the higher levels of  
775 cytoplasmic *Arc* expression in the vCA3 following the food task may indicate a sex differences in  
776 the role of *Arc* in the vCA3 either the recognition of “familiar” food (even for Observers the scent  
777 would be familiar due to their prior interaction with the Demonstrator) or reward/general  
778 consummatory processes. That females also showed significantly higher dual labelling in the  
779 vCA3 – though this effect was small – might also indicate generalized increases in vCA3 *Arc*  
780 transcription in females. Female rats also displayed higher nuclear *Arc* transcription in the ventral  
781 OFC and higher dual levels of *Arc* mRNA in the lateral OFC, though these results are more difficult  
782 to interpret due to the low number of female Control rats whose brain tissue was intact enough to  
783 take OFC counts (n = 2 and 3 for the lateral and ventral OFC, respectively). Data from the Control  
784 rats we do have indicate a possible sex mediated increase in OFC *Arc* mRNA production, but it  
785 is just as possible that this effect would not persist with a higher n. It is notable that some past  
786 research has indicated structural differences in the OFC and functional differences in OFC-  
787 mediated behaviors between female and male rodents [57–59].

788 Possibly our most interesting sex differences in *Arc* mRNA were detected in the prelimbic  
789 cortex. In the prelimbic cortex (PL), males showed overall higher numbers of cells expressing *Arc*  
790 in the cytoplasm and in both the cytoplasm and nucleus (dual expressing) than females. While no  
791 within-sex differences across condition assignments were detected for these counts, we did find  
792 a significant sex/condition interaction in our nuclear prelimbic counts. Specifically, it appears that  
793 while male Demonstrators and Observers did not show increases in *Arc* transcription over  
794 Controls at the fear-recall timepoint, female Demonstrators showed significantly higher nuclear  
795 *Arc* transcriptions than Controls while female Observers fell in the middle between the two. This

796 sex-effect may be driven by the aforementioned deficits observed in learned fear inhibition and  
797 extinction that are observed in females [54–56], as past research has suggested that the PL is  
798 critically involved in stimulating fear behavior [52,60,61], essentially serving an opposing role to  
799 the IL. Furthermore, a number of studies have implicated differences in PL signaling and structure  
800 as potential driving factors for these sex-specific impairments in fear-inhibition and extinction [62–  
801 65]. While we found no significant difference in female and male freezing behavior to the cue, the  
802 upregulation of *Arc* mRNA in response to a non-reinforced fear associated CS in specifically  
803 female Demonstrators may be indicative of differential neural restructuring in the PL that could  
804 ultimately lead to sex differences in fear expression.

## 805 **Conclusions**

806  
807 While the findings of this study did not broaden our understanding of the brain  
808 mechanisms involved in the retrieval of socially acquired memories as much as we had hoped,  
809 our results do provide some potential insights on sex differences in *Arc* expression as well as the  
810 role (or lack thereof) of *Arc* in long-term memory recall. Our findings suggest that - at least in the  
811 prefrontal cortex and vCA3 – the induction of brain activity through recall of socially acquired  
812 information does not appear to be sufficient to cause increases in *Arc* expression over those  
813 caused by the testing procedure alone. However, the validity of this takeaway is certainly brought  
814 into question by the inconclusive results of our behavioral tests, which might suggest that poor  
815 retainment of the socially acquired information was at fault for this lack of effect. We theorize that  
816 this may be because minimal neural restructuring is triggered when recall occurs prior to systems  
817 consolidation. Further research into the role of the *Arc* protein in social learning recall processes  
818 is still warranted given that our behavioral results do not demonstrate social learning in Observer  
819 rats as definitively as we would have hoped. Future research examining overlap in the neural  
820 mechanisms governing different forms of social learning might also benefit from the inclusion of



821 animals undergoing acquisition procedures and animals undergoing remote recall procedures, as  
822 these timepoints may be more likely to induce plasticity changes and thus changes in *Arc*  
823 expression. Though the short timeframe of *Arc* expression in and around the cell body may make  
824 this methodologically difficult to achieve, rapid acquisition of a STFP might be achieved by using  
825 multiple demonstrators at once.

826

## 827 **Declarations**

828 **Author's Contributions:** LAA designed the experiment, gathered and analyzed data, processed  
829 and imaged tissue samples, and drafted the manuscript. ENH and JD assisted with tissue sample  
830 processing. VN assisted with the experiments documented in Supporting Information. MHM and  
831 HJL designed the experiment, gathered data, provided guidance and training for tissue  
832 processing and imaging, and approved the final version of the manuscript.

833 **Availability of data and material:** Raw data files are available in The Monfils Lab repository,  
834 housed in the Texas Data Repository in Dataverse  
835 (<https://dataverse.tdl.org/dataverse/MonfilsFearMemoryLab>). All other materials are available by  
836 request to the authors.

837 **Code availability:** Code is available alongside data and materials in the Monfils Lab repository  
838 (see above).

## 839 **References**

- 840 1. Dawson G, Meltzoff AN, Osterling J, Rinaldi J, Brown E. Children with Autism Fail to Orient  
841 to Naturally Occurring Social Stimuli. *J Autism Dev Disord.* 1998 Dec 1;28(6):479–85.
- 842 2. Zeeland AAS-V, Dapretto M, Ghahremani DG, Poldrack RA, Bookheimer SY. Reward  
843 processing in autism. *Autism Res.* 2010;3(2):53–67.
- 844 3. Chevallier C, Kohls G, Troiani V, Brodtkin ES, Schultz RT. The social motivation theory of  
845 autism. *Trends Cogn Sci.* 2012 Apr 1;16(4):231–9.
- 846 4. Öst L-G. Ways of acquiring phobias and outcome of behavioral treatments. *Behav Res*  
847 *Ther.* 1985 Jan 1;23(6):683–9.
- 848 5. Ollendick TH, King NJ. Origins of childhood fears: An evaluation of Rachman’s theory of  
849 fear acquisition. *Behav Res Ther.* 1991 Jan 1;29(2):117–23.
- 850 6. Merckelbach H, Arntz A, de Jong P. Conditioning experiences in spider phobics. *Behav*  
851 *Res Ther.* 1991;29(4):333–5.
- 852 7. Jeon D, Kim S, Chetana M, Jo D, Ruley HE, Lin S-Y, et al. Observational fear learning  
853 involves affective pain system and Cav1.2 Ca<sup>2+</sup> channels in ACC. *Nat Neurosci.* 2010  
854 Apr;13(4):482–8.
- 855 8. Yusufishaq S, Rosenkranz JA. Post-weaning social isolation impairs observational fear  
856 conditioning. *Behav Brain Res.* 2013 Apr 1;242:142–9.
- 857 9. Kavaliers M, Choleris E, Colwell DD. Learning from others to cope with biting flies: Social  
858 learning of fear-induced conditioned analgesia and active avoidance. *Behav Neurosci.*  
859 2001;115(3):661–74.

- 860 10. Kavaliers M, Colwell DD, Choleris E. Learning to fear and cope with a natural stressor:  
861 individually and socially acquired corticosterone and avoidance responses to biting flies.  
862 *Horm Behav.* 2003 Jan 1;43(1):99–107.
- 863 11. Kavaliers M, Colwell DD, Choleris E. Kinship, familiarity and social status modulate social  
864 learning about “micropredators” (biting flies) in deer mice. *Behav Ecol Sociobiol.* 2005 May  
865 1;58(1):60–71.
- 866 12. Bruchey AK, Jones CE, Monfils M-H. Fear conditioning by-proxy: Social transmission of  
867 fear during memory retrieval. *Behav Brain Res.* 2010 Dec 6;214(1):80–4.
- 868 13. Jones CE, Monfils M-H. Dominance status predicts social fear transmission in laboratory  
869 rats. *Anim Cogn.* 2016 Nov 1;19(6):1051–69.
- 870 14. Agee LA, Jones CE, Monfils M-H. Differing effects of familiarity/kinship in the social  
871 transmission of fear associations and food preferences in rats. *Anim Cogn.* 2019 Nov  
872 1;22(6):1013–26.
- 873 15. Mitchell CJ, Heyes CM, Gardner MR, Dawson GR. Limitations of a Bidirectional Control  
874 Procedure for the Investigation of Imitation in Rats: Odour Cues on the Manipulandum. *Q J*  
875 *Exp Psychol Sect B.* 1999 Aug 1;52(3b):193–202.
- 876 16. Galef BG, Wigmore SW. Transfer of information concerning distant foods: A laboratory  
877 investigation of the ‘information-centre’ hypothesis. *Anim Behav.* 1983 Aug 1;31(3):748–  
878 58.
- 879 17. Galef BG, Mason JR, Preti G, Bean NJ. Carbon disulfide: A semiochemical mediating  
880 socially-induced diet choice in rats. *Physiol Behav.* 1988 Jan;42(2):119–24.

- 881 18. Galef BG. A case study in behavioral analysis, synthesis and attention to detail: Social  
882 learning of food preferences. *Behav Brain Res.* 2012 Jun 1;231(2):266–71.
- 883 19. Posadas-Andrews A, Roper TJ. Social transmission of food-preferences in adult rats. *Anim*  
884 *Behav.* 1983 Feb 1;31(1):265–71.
- 885 20. Countryman RA, Orłowski JD, Brightwell JJ, Oskowitz AZ, Colombo PJ. CREB  
886 phosphorylation and c-Fos expression in the hippocampus of rats during acquisition and  
887 recall of a socially transmitted food preference. *Hippocampus.* 2005;15(1):56–67.
- 888 21. Boix-Trelis N, Vale-Martínez A, Guillazo-Blanch G, Costa-Miserachs D, Martí-Nicolovius M.  
889 Effects of nucleus basalis magnocellularis stimulation on a socially transmitted food  
890 preference and c-Fos expression. *Learn Mem.* 2006 Nov 1;13(6):783–93.
- 891 22. Ross RS, Eichenbaum H. Dynamics of Hippocampal and Cortical Activation during  
892 Consolidation of a Nonspatial Memory. *J Neurosci.* 2006 May 3;26(18):4852–9.
- 893 23. Smith CA, Countryman RA, Sahuque LL, Colombo PJ. Time-courses of Fos expression in  
894 rat hippocampus and neocortex following acquisition and recall of a socially transmitted  
895 food preference. *Neurobiol Learn Mem.* 2007 Jul 1;88(1):65–74.
- 896 24. Lesburguères E, Gobbo OL, Alaux-Cantin S, Hambucken A, Trifilieff P, Bontempi B. Early  
897 Tagging of Cortical Networks Is Required for the Formation of Enduring Associative  
898 Memory. *Science.* 2011 Feb 18;331(6019):924–8.
- 899 25. Knapska E, Nikolaev E, Boguszewski P, Walasek G, Blaszczyk J, Kaczmarek L, et al.  
900 Between-subject transfer of emotional information evokes specific pattern of amygdala  
901 activation. *Proc Natl Acad Sci.* 2006 Mar 7;103(10):3858–62.

- 902 26. Jones CE, Riha PD, Gore AC, Monfils M-H. Social transmission of Pavlovian fear: fear-  
903 conditioning by-proxy in related female rats. *Anim Cogn*. 2014 May 1;17(3):827–34.
- 904 27. Twining RC, Vantrease JE, Love S, Padival M, Rosenkranz JA. An intra-amygdala circuit  
905 specifically regulates social fear learning. *Nat Neurosci*. 2017 Mar;20(3):459–69.
- 906 28. Olsson A, Knapska E, Lindström B. The neural and computational systems of social  
907 learning. *Nat Rev Neurosci*. 2020 Apr;21(4):197–212.
- 908 29. Guzowski JF, McNaughton BL, Barnes CA, Worley PF. Environment-specific expression of  
909 the immediate-early gene *Arc* in hippocampal neuronal ensembles. *Nat Neurosci*. 1999  
910 Dec;2(12):1120–4.
- 911 30. Kim JJ, Jung MW. Neural circuits and mechanisms involved in Pavlovian fear conditioning:  
912 A critical review. *Neurosci Biobehav Rev*. 2006 Jan 1;30(2):188–202.
- 913 31. Laurent V, Westbrook RF. Inactivation of the infralimbic but not the prelimbic cortex impairs  
914 consolidation and retrieval of fear extinction. *Learn Mem*. 2009 Aug 25;16(9):520–9.
- 915 32. Tovote P, Fadok JP, Lüthi A. Neuronal circuits for fear and anxiety. *Nat Rev Neurosci*.  
916 2015 Jun;16(6):317–31.
- 917 33. Agee LA, Monfils M-H. Effect of demonstrator reliability and recency of last demonstration  
918 on acquisition of a socially transmitted food preference. *R Soc Open Sci*. 5(6):172391.
- 919 34. Kikusui T, Takigami S, Takeuchi Y, Mori Y. Alarm pheromone enhances stress-induced  
920 hyperthermia in rats. *Physiol Behav*. 2001 Jan 1;72(1):45–50.
- 921 35. Pellis SM, Pellis VC, McKenna MM. Some Subordinates Are More Equal Than Others:  
922 Play Fighting Amongst Adult Subordinate Male Rats. :10.

- 923 36. Friard O, Gamba M. BORIS: a free, versatile open-source event-logging software for  
924 video/audio coding and live observations. *Methods Ecol Evol.* 2016;7(11):1325–30.
- 925 37. Pellis SM, Pellis VC. Role reversal changes during the ontogeny of play fighting in male  
926 rats: Attack vs. defense. *Aggress Behav.* 1991;17(3):179–89.
- 927 38. Lee HJ, Haberman RP, Roquet RF, Monfils M-H. Extinction and Retrieval + Extinction of  
928 Conditioned Fear Differentially Activate Medial Prefrontal Cortex and Amygdala in Rats.  
929 *Front Behav Neurosci* [Internet]. 2016 [cited 2021 May 16];9. Available from:  
930 <https://www.frontiersin.org/articles/10.3389/fnbeh.2015.00369/full>
- 931 39. Petrovich GD, Holland PC, Gallagher M. Amygdalar and Prefrontal Pathways to the Lateral  
932 Hypothalamus Are Activated by a Learned Cue That Stimulates Eating. *J Neurosci.* 2005  
933 Sep 7;25(36):8295–302.
- 934 40. Paxinos G, Watson C. *The Rat Brain in Stereotaxic Coordinates: Hard Cover Edition.*  
935 Elsevier; 2006. 451 p.
- 936 41. Nikolaienko O, Patil S, Eriksen MS, Bramham CR. Arc protein: a flexible hub for synaptic  
937 plasticity and cognition. *Semin Cell Dev Biol.* 2018 May 1;77:33–42.
- 938 42. Chia C, Otto T. Hippocampal Arc (Arg3.1) expression is induced by memory recall and  
939 required for memory reconsolidation in trace fear conditioning. *Neurobiol Learn Mem.* 2013  
940 Nov 1;106:48–55.
- 941 43. Pilarzyk K, Klett J, Pena EA, Porcher L, Smith AJ, Kelly MP. Loss of Function of  
942 Phosphodiesterase 11A4 Shows that Recent and Remote Long-Term Memories Can Be  
943 Uncoupled. *Curr Biol.* 2019 Jul 22;29(14):2307-2321.e5.

- 944 44. Jones CE. Chapter 8 - The Social Transmission of Associative Fear in Rodents—Individual  
945 Differences in Fear Conditioning by Proxy. :17.
- 946 45. Smith CA, East BS, Colombo PJ. The orbitofrontal cortex is not necessary for acquisition  
947 or remote recall of socially transmitted food preferences. *Behav Brain Res.* 2010 Mar  
948 17;208(1):243–9.
- 949 46. Rudebeck PH, Walton ME, Smyth AN, Bannerman DM, Rushworth MFS. Separate neural  
950 pathways process different decision costs. *Nat Neurosci.* 2006 Sep;9(9):1161–8.
- 951 47. Rolls ET, Grabenhorst F. The orbitofrontal cortex and beyond: From affect to decision-  
952 making. *Prog Neurobiol.* 2008 Nov 1;86(3):216–44.
- 953 48. Wallis JD. Cross-species studies of orbitofrontal cortex and value-based decision-making.  
954 *Nat Neurosci.* 2012 Jan;15(1):13–9.
- 955 49. Izquierdo A. Functional Heterogeneity within Rat Orbitofrontal Cortex in Reward Learning  
956 and Decision Making. *J Neurosci.* 2017 Nov 1;37(44):10529–40.
- 957 50. Randesi M, Zhou Y, Mazid S, Odell SC, Gray JD, Correa da Rosa J, et al. Sex differences  
958 after chronic stress in the expression of opioid-, stress- and neuroplasticity-related genes  
959 in the rat hippocampus. *Neurobiol Stress.* 2018 Feb 1;8:33–41.
- 960 51. Maren S, Phan KL, Liberzon I. The contextual brain: implications for fear conditioning,  
961 extinction and psychopathology. *Nat Rev Neurosci.* 2013 Jun;14(6):417–28.
- 962 52. Vidal-Gonzalez I, Vidal-Gonzalez B, Rauch SL, Quirk GJ. Microstimulation reveals  
963 opposing influences of prelimbic and infralimbic cortex on the expression of conditioned  
964 fear. *Learn Mem.* 2006 Nov 1;13(6):728–33.

- 965 53. Sierra-Mercado D, Padilla-Coreano N, Quirk GJ. Dissociable Roles of Prelimbic and  
966 Infralimbic Cortices, Ventral Hippocampus, and Basolateral Amygdala in the Expression  
967 and Extinction of Conditioned Fear. *Neuropsychopharmacology*. 2011 Jan;36(2):529–38.
- 968 54. Baran SE, Armstrong CE, Niren DC, Hanna JJ, Conrad CD. Chronic stress and sex  
969 differences on the recall of fear conditioning and extinction. *Neurobiol Learn Mem*. 2009  
970 Mar 1;91(3):323–32.
- 971 55. Greiner EM, Müller I, Norris MR, Ng KH, Sangha S. Sex differences in fear regulation and  
972 reward-seeking behaviors in a fear-safety-reward discrimination task. *Behav Brain Res*.  
973 2019 Aug 5;368:111903.
- 974 56. Day HLL, Stevenson CW. The neurobiological basis of sex differences in learned fear and  
975 its inhibition. *Eur J Neurosci*. 2020;52(1):2466–86.
- 976 57. Hasselt FN van, Visser L de, Tieskens JM, Cornelisse S, Baars AM, Lavrijsen M, et al.  
977 Individual Variations in Maternal Care Early in Life Correlate with Later Life Decision-  
978 Making and c-Fos Expression in Prefrontal Subregions of Rats. *PLOS ONE*. 2012 May  
979 31;7(5):e37820.
- 980 58. Bayless DW, Daniel JM. Sex differences in myelin-associated protein levels within and  
981 density of projections between the orbital frontal cortex and dorsal striatum of adult rats:  
982 Implications for inhibitory control. *Neuroscience*. 2015 Aug 6;300:286–96.
- 983 59. Orsini CA, Setlow B. Sex differences in animal models of decision making. *J Neurosci Res*.  
984 2017;95(1–2):260–9.
- 985 60. Corcoran KA, Quirk GJ. Activity in Prelimbic Cortex Is Necessary for the Expression of  
986 Learned, But Not Innate, Fears. *J Neurosci*. 2007 Jan 24;27(4):840–4.



- 987 61. Burgos-Robles A, Vidal-Gonzalez I, Quirk GJ. Sustained Conditioned Responses in  
988 Prelimbic Prefrontal Neurons Are Correlated with Fear Expression and Extinction Failure. *J*  
989 *Neurosci.* 2009 Jul 1;29(26):8474–82.
- 990 62. Fenton GE, Pollard AK, Halliday DM, Mason R, Bredy TW, Stevenson CW. Persistent  
991 prelimbic cortex activity contributes to enhanced learned fear expression in females. *Learn*  
992 *Mem.* 2014 Jan 15;21(2):55–60.
- 993 63. Fenton GE, Halliday DM, Mason R, Bredy TW, Stevenson CW. Sex differences in learned  
994 fear expression and extinction involve altered gamma oscillations in medial prefrontal  
995 cortex. *Neurobiol Learn Mem.* 2016 Nov 1;135:66–72.
- 996 64. Kirry AJ, Herbst MR, Poirier SE, Maskeri MM, Rothwell AC, Twining RC, et al. Pituitary  
997 adenylyl cyclase-activating polypeptide (PACAP) signaling in the prefrontal cortex  
998 modulates cued fear learning, but not spatial working memory, in female rats.  
999 *Neuropharmacology.* 2018 May 1;133:145–54.
- 1000 65. Day HLL, Suwansawang S, Halliday DM, Stevenson CW. Sex differences in auditory fear  
1001 discrimination are associated with altered medial prefrontal cortex function. *Sci Rep.* 2020  
1002 Apr 14;10(1):6300.
- 1003
